1 **Limitation of phosphate assimilation maintains cytoplasmic**  
2 **magnesium homeostasis**

3

4 Roberto E. Bruna<sup>1,2</sup>, Christopher G. Kendra<sup>1,2</sup>, Eduardo A. Groisman<sup>3,4</sup>, Mauricio  
5 H. Pontes<sup>1,2\*</sup>

6

7 <sup>1</sup> *Department of Pathology and Laboratory Medicine, and* <sup>2</sup> *Department of Microbiology*  
8 *and Immunology, Penn State College of Medicine, 500 University Drive, P.O. Box*  
9 *17033, Hershey, PA, 17033, USA*

10 <sup>3</sup> *Department of Microbial Pathogenesis, Yale School of Medicine, 295 Congress*  
11 *Avenue, New Haven, CT 06536, USA*

12 <sup>4</sup> *Yale Microbial Sciences Institute, P.O. Box 27389, West Haven, CT, 06516, USA*

13

14 \*Address correspondence to Mauricio H. Pontes,

15 [mpontes@pennstatehealth.psu.edu](mailto:mpontes@pennstatehealth.psu.edu)

16

17 **Classification**

18 Biology, Microbiology

19

20 **Keywords**

21 Phosphate, ATP, Magnesium, MgtC, *Salmonella*

22

23

24

25 **Author Contributions**

26 R.E.B., C.G.K., E.A.G. and M.H.P. designed research; R.E.B., C.G.K. and M.H.P.

27 performed research; R.E.B., C.G.K. and M.H.P. analyzed data; E.A.G. and

28 M.H.P. contributed reagents/analytic tools; R.E.B. and M.H.P. wrote the paper.

29

## 30 **Abstract**

31 Phosphorus (P) is an essential component of several core biological molecules.  
32 In bacteria, P is mainly acquired as inorganic orthophosphate (Pi). Once in the  
33 cytoplasm, Pi is incorporated into adenosine triphosphate (ATP), which exists  
34 primarily as a Mg<sup>2+</sup> salt. Notably, whereas P is essential, excess of cytosolic Pi  
35 hinders growth. Here we demonstrate that cytotoxic effects of excessive Pi  
36 uptake result from its assimilation into ATP and subsequent disruption of Mg<sup>2+</sup>  
37 dependent processes. We show that *Salmonella enterica* cells experiencing  
38 cytoplasmic Mg<sup>2+</sup> starvation restrict Pi uptake, thereby limiting the availability  
39 of an ATP precursor. This response prevents excessive ATP synthesis,  
40 overproduction of ribosomal RNA, chelation of free cytoplasmic Mg<sup>2+</sup> and the  
41 destabilization of Mg<sup>2+</sup>-dependent core processes that ultimately hinder  
42 bacterial growth and leads to loss of cellular viability. We demonstrate that,  
43 even when cytoplasmic Mg<sup>2+</sup> is not limiting, excessive Pi uptake leads to  
44 increased ATP synthesis, depletion of free cytoplasmic Mg<sup>2+</sup>, inhibition of  
45 translation and growth. Our results establish that bacteria must restrict Pi  
46 uptake to prevent the depletion of cytoplasmic Mg<sup>2+</sup>. Furthermore, they  
47 provide a framework to understand the molecular basis of Pi cytotoxicity and  
48 reveal a regulatory logic employed by bacterial cells to control P assimilation.

49

## 50 **Importance**

51 Phosphorus (P) is essential for life. As the fifth most abundant element in living  
52 cells, P is required for the synthesis of an array of biological molecules  
53 including (d)NTPs, nucleic acids and membranes. Organisms typically acquire  
54 environmental P as inorganic phosphate. While essential for growth and  
55 viability, excessive intracellular Pi is toxic for both bacteria and eukaryotes.

56 Using the bacterium *Salmonella enterica* as a model, we demonstrate that Pi  
57 cytotoxicity is manifested following its assimilation into ATP, which acts as a  
58 chelating agent for intracellular cations, most notably,  $Mg^{2+}$ . These results  
59 identify physiological processes disrupted by excessive Pi and elucidate a  
60 regulatory logic employed by bacteria to prevent uncontrollable P assimilation.

61

## 62 **Introduction**

63 Phosphorus (P) is an intrinsic component of a large number of biological  
64 molecules, including membrane lipids, nucleotides and nucleic acids. This  
65 element is required for many central biological functions, including (1) the  
66 formation of cellular boundaries, (2) the storage and transfer of chemical  
67 energy, (3) the integration and propagation of information in signal  
68 transduction pathways, and (4) the storage, transmission and expression of  
69 genetic information. Bacterial cells mainly uptake P as inorganic phosphate  
70 ( $PO_4^{3-}$ ; Pi), which is then assimilated in the cytoplasm via its incorporation into  
71 adenosine triphosphate (ATP). ATP functions as the main cellular P-carrier  
72 molecule, mediating both the transfer of Pi among biological molecules and the  
73 release of chemical energy to power energy-dependent processes (1).

74 Interestingly, while the assimilation of P is essential, excessive cytoplasmic Pi is  
75 toxic (2–7). This implies that cells must tightly regulate Pi acquisition and  
76 utilization to avoid self-poisoning. Here, we elucidate how bacterial cells  
77 coordinate Pi acquisition and consumption to prevent deleterious effects of  
78 unbalanced Pi metabolism.

79 Following assimilation, negative charges from Pi groups in biomolecules are  
80 neutralized by positively charged ionic species present in the cytoplasm. As  
81 such, the majority of cytoplasmic ATP exists as a salt with positively charged

82 magnesium ( $Mg^{2+}$ ), the most abundant divalent cation in living cells. Indeed,  
83 this ATP: $Mg^{2+}$  salt, rather than the ATP anion, functions as the substrate for  
84 most ATP-dependent enzymatic reactions (8–10). In enteric bacteria, ATP  
85 stimulates the transcription of ribosomal RNAs (rRNA) (11, 12). The synthesis  
86 and activity of ribosomes consume the majority of the ATP in the cell (13).  
87 During ribosome biogenesis, negative charges from Pi groups in the rRNA  
88 backbone chelate large amounts of  $Mg^{2+}$  ions. This process reduces electrostatic  
89 repulsion among Pi groups in the rRNA backbone, enabling the folding and  
90 assembly of functional ribosomes. Not accidentally, ATP and rRNA constitute  
91 the largest cytoplasmic reservoirs of Pi and  $Mg^{2+}$  (9, 11, 13–18). Given this  
92 inherent connection between Pi and  $Mg^{2+}$ , we wondered if cytotoxic effects of  
93 excessive Pi uptake result from its assimilation into ATP and subsequent  
94 disruption of  $Mg^{2+}$  dependent processes in the cytoplasm.

95 In the Gram negative bacterial pathogen *Salmonella enterica*, prolonged  
96 growth in media containing limiting  $Mg^{2+}$  induces cytoplasmic  $Mg^{2+}$  starvation.  
97 This stress promotes the expression of the MgtA, MgtB and MgtC membrane  
98 proteins (19–22). MgtA and MgtB function as high-affinity, ATP-dependent  
99  $Mg^{2+}$  importers, increasing the  $Mg^{2+}$  concentration in the cytoplasm (23, 24). By  
100 contrast, MgtC decreases intracellular ATP levels (25), thereby reducing rRNA  
101 synthesis, lowering steady-state levels of ribosomes, and slowing translation  
102 rates (26). This response reduces levels of assimilated P and, consequently, the  
103 quantity of  $Mg^{2+}$  required as a counter-ion, effectively preventing the depletion  
104 of cytoplasmic  $Mg^{2+}$  that is required for the stabilization of existing ribosomes  
105 and the maintenance of other vital  $Mg^{2+}$ -dependent cellular processes (19, 26,  
106 27). Interestingly, MgtC is also expressed during replication of *Salmonella* inside  
107 mammalian macrophages, where it promotes bacterial survival and enables the  
108 establishment of systemic infections (28, 29). In macrophages, MgtC inhibits the

109 activity of *Salmonella*'s F<sub>1</sub>F<sub>o</sub> ATP synthase, thereby hindering ATP production  
110 via oxidative phosphorylation (30, 31). Yet, mutations in single amino acid  
111 residues of the MgtC protein abolish intramacrophage survival of *Salmonella*  
112 without affecting its growth and viability during cytoplasmic Mg<sup>2+</sup> starvation.  
113 This indicates that MgtC operates by distinct mechanisms in these two growth  
114 conditions (32).

115 In this paper, we reveal that the limitation of phosphate uptake is essential  
116 to maintain cytoplasmic Mg<sup>2+</sup> homeostasis. We establish that during  
117 cytoplasmic Mg<sup>2+</sup> starvation, MgtC lowers ATP levels by inhibiting Pi uptake,  
118 thus limiting an ATP precursor instead of interfering with its enzymatic  
119 generation. We demonstrate that, counterintuitively, limitation of exogenous Pi  
120 availability rescues translation, promotes growth and restores viability to an  
121 *mgtC* mutant. We provide genetic and functional evidence that MgtC hinders  
122 the activity of an uncharacterized transporter, which functions as the main Pi  
123 uptake system in *Salmonella* and likely other bacterial species. Finally, we  
124 establish that even at physiological levels of cytoplasmic Mg<sup>2+</sup>, Pi exerts its  
125 toxicity following its incorporation into ATP and subsequent disruption of  
126 Mg<sup>2+</sup>-dependent processes. While providing a conceptual framework to  
127 understand the underlying basis of Pi cytotoxicity, a phenomenon observed in  
128 both bacteria and eukaryotes (3–7, 33–36), our results uncover a regulatory logic  
129 employed by bacterial cells for the global control of P assimilation.

130

## 131 **Results**

132 **An F<sub>1</sub>F<sub>o</sub> synthase-independent mechanism limits ATP accumulation during**  
133 **low cytoplasmic Mg<sup>2+</sup> stress**

134 In living cells, ATP exists as a  $Mg^{2+}$  salt (10, 13). When cells are faced with  
135 limiting cytoplasmic  $Mg^{2+}$  concentrations, they reduce ATP levels to free  $Mg^{2+}$   
136 ions that are required for other cellular processes, such as the assembly of  
137 ribosomes (26, 27). In *Salmonella*, this reduction in ATP levels is accomplished  
138 by the MgtC membrane protein, which is expressed in response to a number of  
139 physiological signals generated by cytoplasmic  $Mg^{2+}$  starvation (19, 21, 25, 37,  
140 38). MgtC is also expressed during *Salmonella* replication in mammalian  
141 macrophages, where it promotes bacterial survival (28, 29). In macrophages,  
142 MgtC functions by inhibiting the activity of *Salmonella*'s  $F_1F_0$  ATP synthase, the  
143 enzyme responsible for ATP synthesis via oxidative phosphorylation (30).  
144 Notably, a *Salmonella mgtC atpB* double mutant strain—containing a genetically  
145 inactive ATP synthase—was also reported to harbor lower ATP levels than an  
146 *mgtC* single mutant strain during cytoplasmic  $Mg^{2+}$  starvation (30). This result  
147 led to the notion that MgtC also prevents a non-physiological rise in ATP levels  
148 by inhibiting the  $F_1F_0$  ATP synthase when *Salmonella* experiences cytoplasmic  
149  $Mg^{2+}$  starvation (30, 39, 40). However, because the biochemical function of  
150 MgtC during cytoplasmic  $Mg^{2+}$  starvation can be genetically separated from its  
151 function during intramacrophage replication (32), we sought to reexamine the  
152 interpretation of the aforementioned experimental results.

153 The  $F_1F_0$  ATP synthase uses the proton motive force, generated by the  
154 respiratory electron transport chain, to synthesize ATP from ADP and Pi (41,  
155 42). Consequently, an *mgtC atpB* double mutant (or any other strain lacking a  
156 functional ATP synthase) relies exclusively on fermentative pathways to  
157 produce ATP via substrate-level phosphorylation (43). Interestingly, the  
158 aforementioned lower ATP levels observed in a *Salmonella mgtC atpB* double  
159 mutant were obtained during growth on medium containing glycerol as the  
160 carbon source (30). Given that the fermentation of glycerol is extremely

161 inefficient (44, 45), we reasoned that lower ATP levels in the *mgtC atpB* double  
162 mutant could simply reflect an inability of this strain to efficiently ferment  
163 glycerol. To test this notion, we compared ATP levels in wild-type, *mgtC*, *atpB*  
164 and *mgtC atpB* *Salmonella* strains grown in minimal medium containing readily  
165 fermentable glucose as the carbon source and low (10  $\mu$ M)  $Mg^{2+}$ , to induce  
166 cytoplasmic  $Mg^{2+}$  starvation (20, 21). Consistent with our hypothesis, we  
167 established that after 5 h of growth, when cytoplasmic  $Mg^{2+}$  becomes limiting  
168 (26), *mgtC* and *mgtC atpB* strains had 42 and 29-fold higher ATP levels relative  
169 to their *mgtC*<sup>+</sup> isogenic counterparts, respectively (Fig. 1A). Hence, a second  
170 mutation in *atpB* does not abrogate the intracellular ATP accumulation in an  
171 *mgtC*<sup>-</sup> background provided cells are fed with glucose as the carbon source.

172 To further test our hypothesis, we compared ATP levels in wild-type, *mgtC*,  
173 *atpB* and *mgtC atpB* strains at 90 min following a nutritional downshift from  
174 medium containing high (10 mM)  $Mg^{2+}$  and glucose, to media lacking  $Mg^{2+}$  and  
175 containing one of various carbon sources (Fig. 1B). In agreement with our  
176 hypothesis, there was a predictable trend in ATP levels among these strains.  
177 That is, we determined that during cytoplasmic  $Mg^{2+}$  starvation the *mgtC* strain  
178 had high ATP levels regardless of the carbon source (Fig. 1C). By contrast, the  
179 *mgtC atpB* strain had increased ATP levels during growth on readily  
180 fermentable carbon sources (glucose, gluconate, arabinose or pyruvate), but  
181 was unable to do so during growth on inefficiently fermentable glycerol (Fig.  
182 1B-C). As a control, all the strains tested displayed similar ATP levels when  
183 resuspended in high  $Mg^{2+}$ , glucose-containing medium (Fig. 1C). Taken  
184 together, these results indicate that the low ATP levels previously observed in  
185 an *mgtC atpB* strain experiencing cytoplasmic  $Mg^{2+}$  starvation (30) are caused by  
186 an inability to efficiently ferment glycerol, as opposed to an inability to inhibit  
187 the  $F_1F_0$  ATP synthase. Furthermore, these results indicate that *MgtC* inhibits



188 multiple ATP-generating reactions in the cell, not only that one which is carried  
189 out by the  $F_1F_0$  complex.

190

191 **MgtC inhibits inorganic phosphate acquisition and *ipso facto* limits ATP**  
192 **synthesis during cytoplasmic  $Mg^{2+}$  starvation**

193 ATP can be synthesized by several catabolic reactions in the cell (46–48). How  
194 then can MgtC control the activity of multiple ATP-producing enzymatic  
195 reactions? We reasoned that regardless of the identity of the enzymes  
196 catalyzing ATP formation, the overall rate of ATP synthesis in the cell could be  
197 restricted by the availability of substrates. MgtC could, therefore, function by  
198 inhibiting the synthesis or acquisition of an ATP precursor. Interestingly, at the  
199 onset of cytoplasmic  $Mg^{2+}$  starvation, a temporary shortage in the levels of free  
200 cytoplasmic  $Mg^{2+}$  destabilizes the bacterial ribosomal subunits (26). The  
201 resulting decrease in translation efficiency reduces ATP consumption and,  
202 consequently, the recycling of  $P_i$  from ATP. This lowers the concentration of  
203 cytoplasmic  $P_i$ , transiently activating the cytoplasmic  $P_i$ -starvation sensing  
204 PhoB/PhoR two-component system in *Salmonella* (15). Three lines of evidence  
205 led us to hypothesize that MgtC prevents ATP synthesis by limiting  $P_i$  influx  
206 into the cell. First, PhoB/PhoR activation is hampered in an *mgtC* mutant,  
207 indicating that this strain experiences excess cytoplasmic  $P_i$  (15). Second, *mgtC*  
208 and *mgtC atpB* strains have higher intracellular steady-state  $P_i$  levels than wild-  
209 type and *atpB Salmonella* strains (Fig. 2A), confirming that MgtC prevents the  
210 accumulation of intracellular  $P_i$  in an *atpB*-independent fashion. Third, when  
211  $Mg^{2+}$  and  $P_i$  are abundant, ectopic expression of MgtC from a plasmid induces  
212 PhoB/PhoR activation, further suggesting that MgtC causes a shortage in  
213 cytoplasmic  $P_i$  (Fig. S1) (15).

214 To test the aforementioned hypothesis, we measured transport of  
215 radiolabeled Pi ( $^{32}\text{Pi}$ ) following MgtC expression from its native chromosomal  
216 location in response to cytoplasmic  $\text{Mg}^{2+}$  starvation. We established that *mgtC*  
217 cells accumulated four times more radioactivity than the isogenic wild-type  
218 strain after 30 min of growth in the presence of  $^{32}\text{Pi}$  (Fig. 2B). This indicated that  
219 the increased steady-state intracellular Pi levels observed for *mgtC* and *mgtC*  
220 *atpB* mutants (Fig. 2A) arises from the uptake of extracellular Pi, as opposed to  
221 increased Pi release from intracellular sources. [Note that all  $^{32}\text{Pi}$  transport  
222 assays were performed in the presence of cold Pi, at a molar ratio of 1:25  
223 ( $^{32}\text{Pi}:\text{Pi}$ ), to prevent the expression of the PstSCAB Pi transporter resulting from  
224 lack of Pi in the growth medium (1). The influx of Pi observed in the assays is  
225 underestimated (see Discussion and Materials and Methods)].

226 If MgtC functions to restrict cytoplasmic Pi availability, and Pi is required  
227 for ATP synthesis, we posited that the increased ATP levels in an *mgtC* mutant,  
228 but not in wild-type *Salmonella*, could be regulated by the availability of Pi in  
229 the growth medium. To test this prediction, we measured ATP levels in wild-  
230 type and *mgtC* cells grown in minimal media with low  $\text{Mg}^{2+}$  and decreasing  
231 concentrations of exogenous Pi. [Note that bacteria are able to grow in medium  
232 lacking exogenous Pi, due to the residual Pi content present in the mixture of  
233 casamino acids supplemented to the culture medium (see Materials and  
234 Methods)]. Strikingly, we established that, during cytoplasmic  $\text{Mg}^{2+}$  starvation,  
235 the ATP levels in an *mgtC* mutant could be reduced by decreasing exogenous Pi  
236 from 500 to 0  $\mu\text{M}$  (Fig. 2C). By contrast, ATP levels in wild-type cells remained  
237 invariably low (Fig. 2C). Importantly, in the absence of exogenous Pi, wild-type  
238 and *mgtC* cells had similar levels of ATP (Fig. 2C). Taken together, these results  
239 indicate that MgtC controls ATP synthesis by limiting cellular Pi uptake.

240

## 241 **MgtC inhibits a non-canonical Pi transport system**

242 *Salmonella enterica* encodes two *bona fide* Pi import systems: *pitA* and *pstSCAB*  
243 (Fig. 3A). While PitA functions as a metal:phosphate (M:Pi)/proton symporter  
244 (1, 49–51), PstSCAB works as a high affinity, ATP-dependent Pi transporter  
245 (Fig. 3A) (1, 6, 51, 52). In addition to *pitA* and *pstSCAB*, *Salmonella* also harbors  
246 an *yjbB* homolog, which encodes a sodium/phosphate symporter. Whereas  
247 YjbB has been shown to promote Pi export (53), we performed experiments  
248 under a cautious assumption that this protein may also be able to import Pi  
249 (Fig. 3A).

250 To directly test the role of MgtC on the inhibition of PitA, PstSCAB or YjbB,  
251 we measured <sup>32</sup>Pi uptake following ectopic MgtC expression in the wild-type  
252 and a *pitA pstSCAB yjbB* triple mutant (3ΔPi) strains. In wild-type cells,  
253 harboring all known Pi transport systems, MgtC expression led to a mild (17%)  
254 decrease in <sup>32</sup>Pi uptake when compared with the empty vector control (Fig. 3B).  
255 By contrast, ectopic expression of MgtC reduced Pi uptake by 70% in the 3ΔPi  
256 background, relative to the vector control (Fig. 3B), indicating that MgtC  
257 decreases Pi influx in a *pitA pstSCAB yjbB*-independent manner. In support of  
258 these results, a 3ΔPi is able to grow using Pi as the sole P source (Fig. 3C),  
259 indicating that a yet unidentified transporter imports Pi into the cytoplasm to  
260 support the growth of this *Salmonella* strain.

261 Two additional lines of evidence indicated that MgtC inhibits the activity of  
262 a non-canonical Pi transporter. First, because MgtC expression causes a  
263 shortage in cytoplasmic Pi (Fig. 2 and 3B), ectopic expression of MgtC elicits a  
264 dose-dependent activation of the PhoB/PhoR two-component system and  
265 transcription of the PhoB-activated PstSCAB transporter (Fig. S1) (15). Hence,

266 deletion of the MgtC-targeted Pi transporter should result in a constitutively  
267 high *pstS-gfp* activity that is irresponsive to MgtC expression. In other words,  
268 deletion of the Pi transporter should be epistatic to the effect of MgtC  
269 expression on PhoB/PhoR activation levels. Consistent with the notion that  
270 MgtC inhibits a non-canonical Pi transporter, we determined that expression of  
271 MgtC (either ectopically in medium containing 250  $\mu\text{M}$   $\text{Mg}^{2+}$  or natively in  
272 medium containing 10  $\mu\text{M}$   $\text{Mg}^{2+}$ ) induced *pstS* transcription in *pitA* and *yjbB*  
273 single and double mutant strains (Fig. 3D-E). [We purposely did not carry out  
274 this epistatic analysis with the *pstSCAB* mutant for two reasons. First, the  
275 PstSCAB transporter participates in the regulation of the PhoB/PhoR two-  
276 component system through a physical interaction (54). Consequently,  
277 inactivation of the transporter through mutations in *pst* genes leads to  
278 PhoB/PhoR hyperactivation, effectively preventing signal transduction (1, 3, 54,  
279 55). Second, we reasoned that it would be unlikely for cells to have evolved a  
280 regulatory circuit whereby MgtC inhibition of PstSCAB transporter activity  
281 would promote PstSCAB expression (Fig. S1) (15), requiring more MgtC  
282 protein, *ad infinitum*]. Second, we posited that deleting the MgtC-inhibited  
283 transporter in an *mgtC* background should abolish its exacerbated ATP  
284 accumulation (Fig. 2C). However, mutations in either *pitA*, *pstSCAB* or *yjbB* did  
285 not lower the intracellular ATP levels of an *mgtC* mutant (Fig. 3F). In sum, these  
286 experiments indicate that MgtC inhibits Pi uptake by targeting an unidentified  
287 Pi transporter.

288

### 289 **Phosphate limitation rescues the translation and growth defects of an *mgtC*** 290 **mutant experiencing cytoplasmic $\text{Mg}^{2+}$ starvation**

291 The increased ATP levels in an *mgtC* mutant experiencing cytoplasmic  $\text{Mg}^{2+}$   
292 starvation causes ribosomal assembly defects, presumably because  $\text{Mg}^{2+}$  ions

293 required for ribosome stabilization are bound to ATP molecules (26). This  
294 results in inefficient translation, growth arrest and a loss of viability (19, 26), all  
295 of which can be reversed by enzymatic hydrolysis of ATP (26, 27). Given that  
296 MgtC lowers ATP synthesis by inhibiting Pi acquisition (Fig. 2A, 2C and 3B), we  
297 reasoned that the translation, the growth defects and the loss of viability of an  
298 *mgtC* mutant would also be rescued by limiting the access of cells to Pi. To test  
299 this notion, we measured translation rates in the wild-type and *mgtC* strains  
300 experiencing cytoplasmic Mg<sup>2+</sup> starvation in the presence of 500 or 0 μM  
301 exogenous Pi. As predicted, wild-type and *mgtC* strains showed similar  
302 translation rates in the absence of exogenous Pi (Fig. 4A-B). By contrast, during  
303 growth at 500 μM Pi, the translational rate of the *mgtC* mutant was 4.7-fold  
304 reduced in comparison with wild-type levels (Fig. 4A-B).

305 Next, we measured the effect of reducing exogenous Pi on growth and  
306 viability of strains grown in low Mg<sup>2+</sup> medium. We established that steadily  
307 decreasing exogenous Pi in the growth medium from 500 to 0 μM progressively  
308 increased the growth of the *mgtC* mutant strain (Fig. 4C). Remarkably, in the  
309 absence of exogenous Pi, the *mgtC* mutant displayed growth yield and kinetics  
310 indistinguishable from that of the wild-type strain (Fig. 4C). Furthermore,  
311 during growth in medium lacking Pi, the loss of viability observed in the *mgtC*  
312 mutant (19) was suppressed, and the mutant maintained the same number of  
313 colony forming units (CFU) per optical density unit (OD<sub>600</sub>) as the wild-type  
314 strain (Fig. 4D). As expected, the growth of wild-type and *mgtC* mutant  
315 cultures in medium containing 500 μM Pi were indistinguishable when Mg<sup>2+</sup>  
316 was made abundant by raising its concentration from 10 to 500 μM (Fig. 4C).  
317 Altogether, these results establish that MgtC functions to prevent cytotoxic  
318 effects resulting from excessive Pi uptake.

319

320 **Pi cytotoxicity results from its exacerbated assimilation into ATP and**  
321 **subsequent chelation of Mg<sup>2+</sup> during growth under conditions of high Mg<sup>2+</sup>**

322 Excessive Pi uptake has been known to hinder bacterial growth in conditions  
323 where access to extracellular Mg<sup>2+</sup> is not limiting and, consequently, cells are  
324 not anticipated to experience cytoplasmic Mg<sup>2+</sup> starvation (3, 7). For instance, in  
325 *E. coli*, mutations that increase PstSCAB activity or expression cause heightened  
326 Pi uptake and growth inhibition (1–4). Given the aforementioned experimental  
327 results, we hypothesized that excess Pi would exert its cytotoxicity following its  
328 incorporation into ATP, and subsequent chelation of essential cations,  
329 particularly Mg<sup>2+</sup>.

330 According to this hypothesis, PstSCAB overexpression should promote  
331 phenotypes caused by cytoplasmic Mg<sup>2+</sup> starvation—i.e. elevated ATP levels,  
332 inhibition of translation and growth, and induction of MgtC expression (19, 25,  
333 26). Additionally, these phenotypes should be rescued by increasing the  
334 availability of free cytoplasmic Mg<sup>2+</sup>, through the provision of excess Mg<sup>2+</sup> in  
335 the growth medium, or the reversal of P assimilation through enzymatic  
336 hydrolysis of ATP (19, 26, 27). To test this notion, we initially measured ATP  
337 levels and growth of wild-type cells following ectopic over-expression of the  
338 PstSCAB transporter from a plasmid. During growth in medium containing  
339 high (10 mM) Pi and intermediate (0.1 mM) Mg<sup>2+</sup> levels, cells do not typically  
340 experience cytoplasmic Mg<sup>2+</sup> starvation (20, 21) and, consequently, do not  
341 express MgtC (Fig. 6A). Under these growth conditions, PstSCAB  
342 overexpression caused approximately a 4-fold increase in ATP levels in  
343 comparison to control strains harboring either an empty vector or a plasmid  
344 expressing the inner membrane protein PmrB (Fig. 5A). Notably, this rise in

345 ATP levels was accompanied by reductions in growth rate and growth yield,  
346 two phenotypes not observed in the control strains (Fig. 5B).

347 Two lines of evidence indicated that the growth defect resulting from  
348 PstSCAB-induction was caused by an increase in ATP and chelation of free  
349  $Mg^{2+}$ . First, in the presence of a 100-fold excess of  $Mg^{2+}$  (10 mM), PstSCAB  
350 expression caused a minor reduction in growth rate, but enabled cells to reach  
351 the same growth yields as the control strains (Fig. 5C). Importantly,  $Mg^{2+}$   
352 rescued the growth of the PstSCAB expressing strain even though its ATP  
353 levels remained 4-fold higher relative to control strains harboring the empty  
354 vector or expressing the plasmid-borne PmrB (Fig. 5A). Second, ectopic  
355 expression of a plasmid-encoded ATPase (15) rescued the reduction in growth  
356 yield caused by PstSCAB-induction (Fig. 5D). By contrast, no rescue was  
357 observed in cells harboring the vector control (Fig. 5D). Taken together, these  
358 results indicate that excess Pi imported into the cytoplasm is rapidly assimilated  
359 into ATP, causing a decrease in the levels of free cytoplasmic  $Mg^{2+}$ , and  
360 inhibiting growth.

361

362 **Excessive Pi uptake impairs translation and promotes MgtC expression**  
363 **during growth in high  $Mg^{2+}$**

364 If excessive Pi uptake leads to physiological conditions resembling cytoplasmic  
365  $Mg^{2+}$  starvation (Fig. 5A-D) (19, 26, 27), then, increased Pi uptake resulting from  
366 the expression of PstSCAB should also decrease translation rates. Furthermore,  
367 because a reduction in translation rates caused by cytoplasmic  $Mg^{2+}$  starvation  
368 promotes *mgtC* transcription (20, 21, 25, 26, 38), excessive Pi uptake should  
369 promote MgtC expression.

370 To test these predictions, we first measured fluorescence over time in  
371 otherwise wild-type strains harboring a plasmid-borne *gfp* transcriptional



372 fusion to the promoter and leader regions of *mgtC*, and either an empty vector,  
373 the pPmrB, or the pPstSCAB plasmid. We determined that *mgtC-gfp*  
374 fluorescence increased one hour following the induction of PstSCAB expression  
375 (Fig. 6A). This increase in fluorescence was absent or delayed in control strains  
376 harboring the empty vector or expressing the plasmid copy of the inner  
377 membrane protein PmrB (Fig. 6A). [Note that during growth in 25  $\mu\text{M}$   $\text{Mg}^{2+}$ , the  
378 control strains display a minor increase in fluorescence at 4 h of growth. This  
379 small increase in fluorescence results from late onset of cytoplasmic  $\text{Mg}^{2+}$ ,  
380 which is delayed when compared to cells grown at 10  $\mu\text{M}$   $\text{Mg}^{2+}$  (15, 20, 21, 56)].  
381 Consistent with the notion that increased ATP production resulting from  
382 excessive Pi assimilation disrupts translation by sequestering free  $\text{Mg}^{2+}$  ions, the  
383 effect of PstSCAB expression on the time and fluorescence levels of *mgtC-gfp*  
384 was inversely related to the availability of  $\text{Mg}^{2+}$  in the growth medium.  
385 Specifically, fluorescence levels resulting from PstSCAB expression in cultures  
386 grown in 25  $\mu\text{M}$   $\text{Mg}^{2+}$  were higher than those grown in 50  $\mu\text{M}$   $\text{Mg}^{2+}$ , which, in  
387 turn, were higher than those grown in 100  $\mu\text{M}$   $\text{Mg}^{2+}$  (Fig. 6A). Whereas cells  
388 grown in 100  $\mu\text{M}$   $\text{Mg}^{2+}$  displayed a relatively mild increase in *mgtC-gfp* activity  
389 1 h after PstSCAB expression, their fluorescence levels rose rapidly at 7.5 h post  
390 induction (Fig. 6A). This later induction of *mgtC* expression likely reflects the  
391 time point at which cells exhaust the  $\text{Mg}^{2+}$  available in the growth medium, can  
392 no longer neutralize the excess of intracellular Pi incorporated into ATP and,  
393 consequently, are unable to efficiently stabilize their ribosomes (26).

394 To directly test if excessive Pi uptake affected ribosome activity, we  
395 measured the translation rates of the aforementioned strains following the  
396 induction of the plasmid-borne proteins. We determined that during growth in  
397 medium containing 25  $\mu\text{M}$   $\text{Mg}^{2+}$ , PstSCAB expression caused a 2-fold reduction  
398 in translation rates relative to control strains (Fig. 6B-C). Notably, PstSCAB



399 expression also caused a relative reduction in translation rates during growth in  
400 medium containing a 400-fold excess (10 mM) of  $Mg^{2+}$  (Fig. 6B-C). However, at  
401 10 mM  $Mg^{2+}$ , cellular translation rates were approximately 2-fold higher across  
402 all strains (Fig. 6B-C). Taken together, these results indicate that the rapid  
403 assimilation of excessive Pi imported in the cytoplasm reduces levels of free  
404 cytoplasmic  $Mg^{2+}$ , thereby lowering translation efficiency and promoting MgtC  
405 expression.

406

## 407 **Discussion**

### 408 **Pi toxicity via disruption of $Mg^{2+}$ homeostasis**

409 During cytoplasmic  $Mg^{2+}$  starvation, *Salmonella* expresses the MgtC membrane  
410 protein. This protein promotes bacterial growth and viability by virtue of its  
411 ability to reduce ATP levels, thereby increasing the concentration of free  
412 intracellular  $Mg^{2+}$  needed for the functioning of vital  $Mg^{2+}$ -dependent processes  
413 (19, 21, 25–27). In this work, we demonstrate that MgtC lowers ATP levels by  
414 inhibiting Pi uptake (Fig. 2A-C and 3B), thus limiting the availability of an ATP  
415 precursor rather than interfering with the enzymatic catalysis of ATP-  
416 generating reactions *per se* (Fig. 1A-C and 2A-C). We establish that MgtC  
417 hinders the activity of a yet unidentified transporter, which functions as the  
418 main Pi uptake system in *Salmonella* (Fig. 3A-F). Finally, we show that, even  
419 when cytoplasmic  $Mg^{2+}$  is not limiting, excessive Pi uptake leads to increased  
420 ATP synthesis, depletion of free cytoplasmic  $Mg^{2+}$ , inhibition of translation and  
421 growth (Fig. 5A-D and 6A-C). These results indicate that bacterial cells control  
422 Pi uptake and subsequent assimilation to avoid the depletion of free  
423 cytoplasmic  $Mg^{2+}$ .

424 The capacity of MgtC to maintain physiological ATP levels during  
425 cytoplasmic  $Mg^{2+}$  starvation had been so far ascribed to its inhibitory effect on

426 *Salmonella*'s F<sub>1</sub>F<sub>o</sub> ATP synthase (30). Here, we demonstrate that this inaccurate  
427 conclusion resulted from an experimental artifact arising from the propagation  
428 of *atpB* strains in a poorly fermentable carbon source (Fig. 1A-C). Indeed, the  
429 notion that MgtC lowers ATP levels in an F<sub>1</sub>F<sub>o</sub> ATP synthase-independent  
430 fashion has found support on a recent study by an independent group. While  
431 also growing cells in a poorly fermentable carbon source, the authors were still  
432 able to show that overexpression of MgtC lowers ATP levels in *atpB* mutants  
433 (40). Yet, while this study was unable to identify the source of ATP reduction,  
434 we now determine its origin. We establish that MgtC limits Pi uptake,  
435 simultaneously hindering *all* ATP-generating enzymatic reactions in the cell  
436 (Fig. 7).

437 MgtC inhibition of Pi uptake occurs independently of all characterized Pi  
438 importers (PitA and PstSCAB) as well as a Pi exporter (YjbB). Interestingly,  
439 heterologous MgtC expression in *E. coli* also activates its PhoB/PhoR two-  
440 component system (Fig. S2). Three bona fide Pi importers have been described  
441 in *E. coli*: PstSCAB, PitA and PitB, which is not present in *Salmonella* (Fig. 3A)  
442 (1, 51, 57). Notably, *E. coli* strains containing mutations in all these three Pi  
443 transport systems are still able to grow on minimal medium with Pi as the only  
444 P source (51, 58). This indicates that *E. coli* also encodes a homolog of the Pi  
445 transporter that is targeted by MgtC in *Salmonella*. In fact, given that MgtC  
446 homologs promote growth in low Mg<sup>2+</sup> in a large number of distantly related  
447 species (32, 59–65) this transporter is likely to be wide spread in bacteria.

448 If MgtC inhibits the activity of a single Pi importer, what then, prevents Pi  
449 uptake by other transport systems? Transcription of the high affinity PstSCAB  
450 Pi importer is induced by the PhoB/PhoR two-component system in response  
451 to a decrease in cytoplasmic Pi. During the initial stages of cytoplasmic Mg<sup>2+</sup>  
452 starvation, the ribosomal subunits are unable to assemble efficiently (26). This

453 leads to a decrease in translation efficiency and a concomitant reduction in ATP  
454 hydrolysis and free cytoplasmic Pi, which triggers *pstSCAB* transcription (15).  
455 Whereas expression of MgtC leads to inhibition of the main Pi transporter, the  
456 expression of MgtA and MgtB results in an influx of Mg<sup>2+</sup> into the cytoplasm  
457 (19-24). This response restores ribosomal subunit assembly and increases  
458 translation efficiency (Fig. 7). Efficient ATP consumption by translation  
459 reactions (most notably the charging of tRNAs and the synthesis of GTP, which  
460 is subsequently used by elongation factors) (26), replenishes intracellular Pi,  
461 effectively repressing PhoB/PhoR and *pstSCAB* transcription (15).

462 Transcription of *pitA* is regulated by the availability of Pi:Zn<sup>2+</sup> salt (66). Yet,  
463 in *E. coli*, PitA undergoes post-transcriptional repression during Mg<sup>2+</sup>  
464 starvation. This repression is orchestrated by the Mg<sup>2+</sup>-sensing PhoP/PhoQ  
465 two-component system (67), which, in *Salmonella*, activates transcription of  
466 *mgtCB* and *mgtA* (19). Interestingly, growth in low Mg<sup>2+</sup> decreases *pitA* mRNA  
467 levels in both *Salmonella* and *Yersinia pestis* (68, 69). This suggests that inhibition  
468 of PitA expression is a common feature of the Mg<sup>2+</sup> starvation response among  
469 enteric bacteria. Because PitA transports M:Pi salts, repression of this gene may  
470 also prevent the importation of other metal cations, such as zinc, that can  
471 readily replace scarce Mg<sup>2+</sup> in enzymatic reactions (70–72). In this context, it is  
472 interesting to note that the Pho84 Pi transporter of *Saccharomyces cerevisiae* can  
473 promote metal toxicity by importing M:Pi salts (73–76).

474 If excessive ATP is toxic during cytoplasmic Mg<sup>2+</sup> starvation, why then does  
475 MgtC function by hindering Pi uptake and not by directly inhibiting ATP-  
476 generating enzyme(s)? Depending on the growth condition, the production of  
477 ATP via the oxidation of carbon can occur via several distinct pathways, each  
478 involving dozens of enzymes (48). While we can conceive that a single protein  
479 may have the capacity to directly inhibit a myriad of distinct enzymes,

480 evolution has likely provided cells with a more parsimonious solution for this  
481 problem. Because Pi is an ATP precursor, limitation of Pi uptake enables cells  
482 to indirectly hinder *all* ATP generating reactions, *independently* from the  
483 metabolic pathway(s) used to oxidize the available carbon source(s) (Fig. 1B and  
484 7). Hence, the inhibition of Pi uptake by MgtC allows *Salmonella* to lower ATP  
485 synthesis, eliciting a physiological response to a lethal depletion of cytoplasmic  
486 Mg<sup>2+</sup>, whether carbon is being metabolized via classic glycolysis, the Entner-  
487 Doudoroff, the Pentose Phosphate, the Tricarboxylic Acid Cycle or any other  
488 energy-generating pathway (Fig. 1B and 7).

489

#### 490 **On the activation of PhoR by MgtC**

491 The results presented herein challenge a proposed model of MgtC functionality  
492 set forth by Choi *et al.* (77). In this study, the authors hypothesize that MgtC  
493 promotes PstSCAB expression and Pi-uptake via the activation of the  
494 PhoB/PhoR two-component system through a direct physical interaction  
495 between MgtC and the PhoR histidine kinase (77). Several pieces of our data  
496 dispute this model and demonstrate that MgtC inhibits Pi uptake to maintain  
497 cellular viability during cytoplasmic Mg<sup>2+</sup> starvation.

498 First, the growth and viability defects of an *mgtC* mutant are due to excess Pi  
499 uptake, which is acutely toxic to cells experiencing cytoplasmic Mg<sup>2+</sup> starvation  
500 (Fig. 4C-D; see discussion above). Hence, it is hard to envision a model (77)  
501 where MgtC would promote the uptake of precisely the compound responsible  
502 for growth inhibition and loss of viability in cells lacking *mgtC* (Fig. 4C-D). In  
503 this light, there are discrepancies that arise in the model proposed by Choi *et al.*  
504 due to the lack of both physiological explanations and phenotypic assays to  
505 support the conclusion that cells import Pi during cytoplasmic Mg<sup>2+</sup> starvation  
506 (77).

507 Second, when MgtC is expressed from its normal chromosomal location in  
508 response to cytoplasmic Mg<sup>2+</sup> starvation, PhoB/PhoR activation and *pstSCAB*  
509 transcription precede MgtC expression, which persists long after *pstSCAB*  
510 transcription is subdued (Fig. S3A-B) (15). Hence, during physiologically  
511 relevant conditions, MgtC is unlikely to promote *pstSCAB* expression and Pi  
512 uptake as proposed (77). Instead, this phenomenon is better explained by the  
513 translation defect caused by a transient decrease in free cytoplasmic Mg<sup>2+</sup>,  
514 which is normalized by the activities of MgtA, MgtB and MgtC, expressed after  
515 PhoB/PhoR is activated (15, 26). Consistent with this notion, artificial influx of  
516 extracellular Pi by ectopic PstSCAB leads to increased ATP synthesis,  
517 disruption of free Mg<sup>2+</sup> pools, inhibition of translation and promotion of *mgtC*  
518 transcription (Fig. 5A-D and 6A-C). This indicates that MgtC is expressed in  
519 response to stress(es) generated by increased Pi uptake. Notably, in *E. coli*,  
520 cytoplasmic Mg<sup>2+</sup> starvation also disrupts translation homeostasis (26) and  
521 promotes a PhoB/PhoR activation (Fig. S4), even though this organism lacks an  
522 MgtC homolog.

523 Third, when Mg<sup>2+</sup> is abundant, ectopic MgtC promotes *pstSCAB* expression  
524 (Fig. S1) (15). However, in contrast to results presented by Choi *et al.* (77) we  
525 established that increased *pstSCAB* transcription observed in this context *does*  
526 *not* lead to significant alterations in intracellular Pi levels (Fig. 3B). This is  
527 because, under these conditions, *pstSCAB* transcription is a homeostatic  
528 response resulting from the inhibition of a main Pi transporter by MgtC (Fig.  
529 2A-B and 3B-F). These types of regulatory responses are common among  
530 multiple transport systems, and can be abolished by eliminating functional  
531 redundancy. For instance, while deletion of the house keeping Mg<sup>2+</sup> transporter  
532 *corA* increases the expression of the specialized Mg<sup>2+</sup> transporter MgtA (78),  
533 CorA overexpression repress MgtA production (56). That is, these genetic

534 modifications alter the concentration of cytoplasmic  $Mg^{2+}$ , which governs MgtA  
535 expression (20, 21). Likewise, deletion of the *pitA* Pi transporter (Fig. S5) or  
536 ectopic overexpression of MgtC leads to increased *pstS* transcription (Fig. S1).  
537 That is, cells sense and compensate for a shortage in intracellular Pi caused by  
538 these genetic alterations and increase expression of the PstSCAB system. In this  
539 light, ectopic MgtC expression in wild-type cells leads to a minor reduction in  
540 Pi uptake, but severely impairs Pi uptake in strains lacking the Pi transport  
541 systems encoded by *pitA*, *pstSCAB* and *yjbB* (Fig. 3B).

542 Fourth, substitution of PhoR leucine 421 by an alanine was reported to  
543 disrupt PhoR interaction with MgtC, preventing the activation of PhoB/PhoR  
544 by cytoplasmic  $Mg^{2+}$  starvation (77). We measured PhoB activation in wild-  
545 type and *phoR*<sup>L421A</sup> strains using a *pstS-gfp* reporter fusion. Interestingly, wild-  
546 type and *phoR*<sup>L421A</sup> strains displayed similar fluorescence levels, either when  
547 MgtC was ectopically induced (Fig. S6A), or when it was expressed from its  
548 normal chromosomal location during cytoplasmic  $Mg^{2+}$  starvation (Fig. S6B).  
549 Hence, PhoR L421 residue does not participate in a hypothetical MgtC-  
550 mediated PhoB/PhoR activation as proposed (77).

551

## 552 **Pi toxicity and the control of P assimilation**

553 Mutations that increase Pi uptake via the PstSCAB transport system have been  
554 shown to inhibit growth in a wide range of bacterial species (1–7). Yet, the  
555 underlying molecular basis for this phenomenon has remained elusive. The  
556 realization that MgtC promotes growth and viability during cytoplasmic  $Mg^{2+}$   
557 starvation (19, 21) by inhibiting Pi uptake (Fig. 2A-B and 3B) and, consequently,  
558 ATP synthesis (Fig. 2C) (27) prompted us to examine the physiological basis of  
559 Pi toxicity observed in the context of the aforementioned mutations. We  
560 established that increased Pi transport via PstSCAB causes a rise in ATP

561 concentrations (Fig. 5A). Increased ATP disrupts the pools of free cytoplasmic  
562  $Mg^{2+}$  (Fig. 6A), thereby inhibiting translation (Fig. 6B-C), growth (Fig. 5B), and  
563 precipitating the expression of MgtC when concentrations of  $Mg^{2+}$  in the  
564 growth medium is sufficiently high to silence its expression (Fig. 6A) (20, 21,  
565 25). Whereas these results establish that the toxic effects of excessive Pi are  
566 manifested following its assimilation into ATP, they shed light into the  
567 underlying causes of Pi toxicity and reveal a logic for cellular control of P  
568 assimilation. Rapid synthesis of ATP, and ATP-derived highly charged Pi  
569 anions such as rRNA and poly-Pi (26, 79, 80), depletes the pools of free  
570 cytoplasmic  $Mg^{2+}$ . Cells must control Pi uptake because, when biosynthetic  
571 precursors are abundant, simultaneous inhibition of all ATP-generating  
572 reactions in the cytoplasm cannot be easily attained.

573

## 574 **Materials and Methods**

### 575 **Bacterial strains, plasmid constructs, primers, and growth conditions**

576 The bacterial strains and plasmids used in this study are listed in Table S1, and  
577 oligonucleotide sequences are presented in Table S2. Single gene knockouts  
578 and deletions were carried out as described (81). Mutations generated via this  
579 method were subsequently moved into clean genetic backgrounds via phage  
580 P22-mediated transduction as described (82). For chromosomal point  
581 mutations, detailed strain construction is described below. Bacterial strains  
582 used in recombination and transduction experiments were grown in LB  
583 medium at 30° C or 37° C (81, 82). When required, the LB medium was  
584 supplemented with ampicillin (100 µg/mL), chloramphenicol (20 µg/mL),  
585 kanamycin (50 µg/mL), and/or L-arabinose (0.2% wt/vol).

586 Unless stated otherwise, physiological experiments with bacteria were  
587 carried out at 37° C with shaking at 250 rpm in MOPS medium (83) lacking



588 CaCl<sub>2</sub> (to avoid repression of the PhoP/PhoQ system) (84) and supplemented  
589 with 0.1% (w/v) bacto casamino acids (BD Difco), 25 mM glucose, and the  
590 indicated amounts of MgCl<sub>2</sub> and K<sub>2</sub>HPO<sub>4</sub>. Experiments were conducted as  
591 follows: after overnight (~16- to 20-h) growth in MOPS medium containing 10  
592 mM MgCl<sub>2</sub> and 2 mM K<sub>2</sub>HPO<sub>4</sub>, cells washed three times in medium lacking  
593 Mg<sup>2+</sup> and Pi and inoculated (1:100) in fresh medium containing the indicated  
594 concentrations of MgCl<sub>2</sub> and K<sub>2</sub>HPO<sub>4</sub> and propagated for the corresponding  
595 amount of time. It should be noted that at a concentration of 0.1% (w/v) bacto  
596 casamino acids (BD Difco), the medium already contains ~163 μM Pi. During  
597 physiological experiments, selection of plasmids was accomplished by the  
598 addition of ampicillin at 100 μg/mL (overnight growth) or 30 μg/mL  
599 (experimental condition), chloramphenicol at 20 μg/mL (overnight growth) or  
600 10 μg/mL (experimental condition), and/or kanamycin at 50 μg/mL (overnight  
601 growth) or 20 μg/mL (experimental condition). Unless specified otherwise,  
602 heterologous expression of proteins was achieved by treatment of cultures with  
603 250 μM (pMgtC, pPstSCAB) isopropyl β-D-1-thiogalactopyranoside (IPTG).  
604 ATPase expression from pBbB2k-AtpAGD was attained without the addition of  
605 the inductor.

606

#### 607 **Estimation of intracellular ATP**

608 Intracellular ATP was estimated as described (15). Briefly, luminescence  
609 measurements were performed in a SpectraMax i3x plate reader (Molecular  
610 Devices) with a BacTiter-Glo Microbial Cell Viability Assay Kit (Promega) in  
611 heat-inactivated cells (80° C for 10 min) according to the manufacturers  
612 instructions. Protein concentrations in cell samples were estimated using a



613 Rapid Gold BCA Protein Assay Kit (Pierce). ATP measurements were  
614 normalized by the protein content of the samples.

615

### 616 **Estimation of intracellular Pi**

617 Total Pi in the samples was estimated from crude cell extracts using the  
618 molybdenum blue method as described before (15, 85). The amounts of Pi in  
619 the samples were estimated from a standard curve generated from dilutions of  
620 a  $K_2HPO_4$  solution of known concentration, and then normalized by the amount  
621 of protein present in each reaction.

622

### 623 **Phosphate transport assay**

624 Wild-type (14028s) or *mgtC* (EL4) *Salmonella* were grown in MOPS medium  
625 containing 10  $\mu$ M  $MgCl_2$  and 500  $\mu$ M  $K_2HPO_4$  during 3 h. Wild-type (14028s) or  
626  $\Delta 3Pi$  (RB39) cells harboring either pVector or pMgtC were grown in MOPS  
627 containing 250  $\mu$ M  $MgCl_2$  and 500  $\mu$ M  $K_2HPO_4$  until  $OD_{600} \approx 0.2$ , at which point,  
628 MgtC expression was induced for 15 min with the addition of 750  $\mu$ M IPTG. To  
629 assay the transport of Pi, 20  $\mu$ Ci of radioactive Pi solution (10  $\mu$ L from a 2 mCi  
630  $K_2H^{32}PO_4$  at a concentration of 2 mM of  $K_2H^{32}PO_4$ , PerkinElmer cat. no. NEX055)  
631 was added to 1 mL of cell suspension. At the indicated time points, 50  $\mu$ L of  
632 each sample was submitted to rapid filtration through 0.45  $\mu$ m mixed cellulose  
633 ester membrane filters (Whatman) with an applied vacuum. The filters were  
634 washed three times with 1 mL of PBS buffer, and subsequently soaked in 5 mL  
635 of scintillation fluid (Research Products International). The amount of  
636 radioactivity taken up by the cells was determined with a scintillation counter  
637 (Triathler multilabel tester, HIDEX) using the  $^{32}P$ -window and by counting each  
638 vial for 20 s. Radioactive counts per minute were normalized by protein

639 content using a Rapid Gold BCA Protein Assay Kit (Pierce). <sup>32</sup>Pi uptake of each  
640 sample was normalized against the corresponding control in each independent  
641 experiment.

642

#### 643 **Monitoring gene expression via fluorescence**

644 Following overnight growth, bacteria were washed thrice and diluted in 1:100  
645 in 1 mL of MOPS medium containing the appropriate concentrations of Mg<sup>2+</sup>  
646 and Pi, and aliquot as technical replicates or triplicates into black, clear-bottom,  
647 96-well plates (Corning). Two drops of mineral oil were used to seal the wells  
648 and prevent evaporation, and cultures were grown at 37° C with auto-mixing in  
649 a SpectraMax i3x plate reader (Molecular Devices). At the desired time points,  
650 the green fluorescence (excitation 485 nm/emission 535 nm) and absorbance at  
651 600 nm (OD<sub>600</sub>) from the wells of the plates were read. Fluorescence  
652 measurements were normalized by the OD<sub>600</sub> of the samples.

653

#### 654 **Construction of plasmid pPstSCAB (pUHE-PstSCAB)**

655 Phusion® High-Fidelity DNA Polymerase (New England Biolabs) was used in a  
656 PCR with primers 446 and 447 and *Salmonella* genomic DNA as template. The  
657 PCR product was resolved by agarose gel electrophoresis, purified using  
658 Monarch® Gel Extraction Kit (New England Biolabs), and ligated into  
659 BamHI/HindIII-digested pUHE-21-2-lacIq plasmid (86), using NEBuilder®  
660 HiFi DNA Assembly Cloning Kit (New England BioLabs). The assembly  
661 reaction was transformed into electrocompetent EC100D *E. coli*. The construct  
662 was verified by DNA sequencing using primers 448-452.

663

#### 664 **Construction of plasmid pATPase (pBbB2K-AtpAGD)**

665 Phusion® High-Fidelity DNA Polymerase (New England BioLabs) was used in  
666 a PCR with primers 799 and 800 and pUHE-AtpAGD (15) as template. PCR  
667 product was resolved by agarose gel electrophoresis, purified using Monarch®  
668 Gel Extraction Kit (New England Biolabs), and ligated into BamHI/EcoRI-  
669 digested pBbB2k-GFP plasmid (87), using NEBuilder® HiFi DNA Assembly  
670 Cloning Kit (New England BioLabs). The assembly reaction was transformed  
671 into electrocompetent EC100D *E. coli*. The functionality of the construct was  
672 tested by its capacity to decrease ATP levels in a *Salmonella mgtC* mutant strain  
673 (EL4) following growth in 10 µM Mg<sup>2+</sup> medium (15).

674

#### 675 **Construction of plasmid pPmgtCB-GFP**

676 Phusion® High-Fidelity DNA Polymerase (New England Biolabs) was used in a  
677 PCR with primers W3443 and W3444 and plasmid pGFP303 (25) as template.  
678 The PCR product was resolved by agarose gel electrophoresis, purified using  
679 Monarch® Gel Extraction Kit (New England Biolabs), and ligated into  
680 SalI/HindIII-digested pACYC184 plasmid (88), using NEBuilder® HiFi DNA  
681 Assembly Cloning Kit (New England BioLabs). Assembly reactions were  
682 transformed into electrocompetent EC100D *E. coli*. The integrity of the construct  
683 was verified by DNA sequencing, and its functionality was verified by  
684 monitoring fluorescence in wild-type (14028s) *Salmonella* during growth in  
685 MOPS medium containing different MgCl<sub>2</sub> concentrations (21).

686

#### 687 **Construction of *phoR*<sup>L421A</sup> strain (MP1665)**

688 Phusion® High-Fidelity DNA Polymerase (New England Biolabs) was used in a  
689 PCR with primers 477 and 478 and plasmid pSLC-242 (89) as template. The  
690 PCR product was resolved by agarose gel electrophoresis, purified using  
691 Monarch® Gel Extraction Kit (New England Biolabs), and integrated into the

692 chromosome of wild-type (14028s) *Salmonella* via  $\lambda$ -Red-mediated  
693 recombination using plasmid pSIM6 as described (81). Recombinant cells  
694 containing the insertion were selected on LB supplemented with 20  $\mu\text{g}/\text{mL}$   
695 chloramphenicol and 30 mM glucose at 30°C. This insertion was subsequently  
696 replaced via a second  $\lambda$ -Red mediated recombination of primer 480 into the  
697 chromosome. Cells were recovered for 3 h as described (89) and selected on  
698 MOPS medium containing 9.5 mM  $\text{NH}_4\text{Cl}$  as the sole nitrogen source and 30  
699 mM rhamnose as the sole carbon source. The identity of the *phoR*<sup>L421A</sup> construct  
700 was verified by PCR with primers 481 and 482 followed by DNA sequencing.  
701 Its functionality was verified by introducing pPpstS-GFPc plasmid into this  
702 strain, and measuring fluorescence during growth in MOPS containing  
703 different  $\text{K}_2\text{HPO}_4$  concentrations (15).

704

#### 705 **L-azidohomoalanine (AHA) labeling and quantification**

706 *Salmonella* strains were grown in MOPS medium supplemented with an amino  
707 acids mixture lacking methionine (Mix–Met: 1.6 mM of alanine, glycine,  
708 leucine, glutamate and serine, 1.2 mM glutamine and isoleucine, 0.8 mM  
709 arginine, asparagine, aspartate, lysine, phenylalanine, proline, threonine and  
710 valine, 0.4 mM histidine and tyrosine, and 0.2 mM cysteine and tryptophan),  
711 with the indicated  $\text{MgCl}_2$  and  $\text{K}_2\text{HPO}_4$  concentrations. At the corresponding  
712 timepoints, cultures were labeled with 40  $\mu\text{M}$  of AHA for 30 min (Click  
713 Chemistry Tools). At the end of the labeling period, bacterial cultures were  
714 treated with 100  $\mu\text{g}/\text{mL}$  of chloramphenicol. Cells were collected by  
715 centrifugation at 4°C, washed thrice with ice-cold phosphate buffered saline  
716 (PBS) and stored at -80°C.

717 Cell pellets were thawed and re-suspended in a lysis buffer consisting of  
718 50 mM Tris-HCl pH 8.0, 5% glycerol, 0.5% sodium dodecyl sulfate (SDS) and 1x  
719 protease inhibitor cocktail (Roche). Cells were lysed in a MiniBeadbeater-96  
720 (BioSpec) and insoluble debris was removed by centrifugation (10 min, 10,000 X  
721 g, 4°C). Covalent attachment of fluorescent AFDye 488-alkyne (Click Chemistry  
722 Tools) to AHA containing proteins was carried out using Click-&-Go™ Protein  
723 Reaction Buffer Kit (Click Chemistry Tools) according to the manufacturer's  
724 instructions. Protein concentrations were determined using a Pierce BCA  
725 Protein Assay Kit (Thermo Fisher Scientific). Fluorescent signals in samples  
726 were measured in a SpectraMax i3x plate reader (Molecular Devices) with 480  
727 nm excitation and 520 nm emission wavelengths. The rate of protein synthesis  
728 was estimated as the fluorescence signal normalized by the protein content of  
729 the sample.

730 To determine if alterations on protein synthesis were systemic, AF488-  
731 labeled samples were separated by SDS-PAGE and fluorescence in gels was  
732 captured with an Amersham Imager 680 (GE Healthcare Life Sciences). To  
733 ensure that equal amounts of protein were loaded in each lane, gels were  
734 subsequently stained using the ProteoSilver™ Plus Silver Stain Kit (Sigma).

735

### 736 **MgtC immunoblot analysis**

737 Wild-type (14028s) or *mgtC* (ELA) *Salmonella* were grown in MOPS medium  
738 containing 10 μM MgCl<sub>2</sub> and 500 μM K<sub>2</sub>HPO<sub>4</sub> for the indicated amount of time.  
739 Equivalent amounts of bacterial cells normalized by OD<sub>600</sub> values were  
740 collected, washed with PBS, suspended in 0.15 mL SDS sample buffer (Laemmli  
741 sample buffer), and boiled. Cell extracts were loaded and resolved using 4–12%  
742 NuPAGE gels (Life Technologies). Proteins were then electro-transferred onto  
743 nitrocellulose membrane (iBlot; Life Technologies) following the manufacturer's

744 protocol. MgtC was detected using polyclonal anti-MgtC antibody (90) and the  
745 secondary antibody, horseradish peroxidase-conjugated anti-mouse IgG  
746 fragment (GE). The blots were developed with the SuperSignal West Femto  
747 Chemiluminescent system (Pierce) and visualized with an Amersham Imager  
748 600 (GE Healthcare Life Sciences). Mouse-anti RpoB antibody (Thermo Fisher  
749 Scientific) was used as the loading control.

750

### 751 **Image acquisition, analysis and manipulation**

752 Plates, gel and membrane images were acquired using an Amersham Imager  
753 600 (GE Healthcare Life Sciences). ImageJ software (91) was used to crop the  
754 edges and adjust the brightness and contrast of the images. These modifications  
755 were simultaneously performed across the entire set images to be shown.

756

### 757 **Acknowledgments**

758 M. H. P. is supported by grant AI148774 from the National Institutes of Health  
759 and funds from The Pennsylvania State University College of Medicine. E.A.G.  
760 is supported by grants AI49561 and AI120558 from the National Institutes of  
761 Health.

762

### 763 **References**

764 1. **Wanner BL.** 1996. Phosphorus assimilation and control of the phosphate  
765 regulon, p. 1357–81. *In* Neidhardt, FC, Curtiss, R, Ingraham, JL, Lin, ECC,  
766 Low, KB, Magasanik, WS, Reznikoff, WS, Riley, M, Scharchter, M,  
767 Umbarger, HE (eds.), *Escherichia coli* and *Salmonella*: Cellular and  
768 Molecular Biology, 2nd ed. American Society for Microbiology,  
769 Washington D.C.

- 770 2. **Webb DC, Rosenberg H, Cox GB.** 1992. Mutational analysis of the  
771 *Escherichia coli* phosphate-specific transport system, a member of the  
772 traffic ATPase (or ABC) family of membrane transporters. A role for  
773 proline residues in transmembrane helices. *J Biol Chem* **267**:24661–24668.
- 774 3. **Steed PM, Wanner BL.** 1993. Use of the *rep* technique for allele  
775 replacement to construct mutants with deletions of the *pstSCAB-phoU*  
776 operon: Evidence of a new role for the PhoU protein in the phosphate  
777 regulon. *J Bacteriol* **175**:6797–6809.
- 778 4. **Rice CD, Pollard JE, Lewis ZT, McCleary WR.** 2009. Employment of a  
779 promoter-swapping technique shows that PhoU modulates the activity of  
780 the PstSCAB<sub>2</sub> ABC transporter in *Escherichia coli*. *Appl Environ Microbiol*  
781 **75**:573–582.
- 782 5. **Lubin EA, Henry JT, Fiebig A, Crosson S, Laub MT.** 2016. Identification  
783 of the PhoB regulon and role of PhoU in the phosphate starvation  
784 response of *Caulobacter crescentus*. *J Bacteriol* **198**:187–200.
- 785 6. **Zheng JJ, Sinha D, Wayne KJ, Winkler ME.** 2016. Physiological roles of  
786 the dual phosphate transporter systems in low and high phosphate  
787 conditions and in capsule maintenance of *Streptococcus pneumoniae* D39.  
788 *Front Cell Infect Microbiol* **6**:63.
- 789 7. **diCenzo GC, Sharthiya H, Nanda A, Zamani M, Finan TM.** 2017. PhoU  
790 allows rapid adaptation to high phosphate concentrations by modulating  
791 PstSCAB transport rate in *Sinorhizobium meliloti*. *J Bacteriol* **199**:1–20.
- 792 8. **Maguire ME, Cowan JA.** 2002. Magnesium chemistry and biochemistry.  
793 *Biometals* **15**:203–10.



- 794 9. **Klein DJ, Moore PB, Steitz TA.** 2004. The contribution of metal ions to  
795 the structural stability of the large ribosomal subunit. *RNA* **10**:1366–79.
- 796 10. **Storer AC, Cornish-Bowden A.** 1976. Concentration of MgATP<sup>2-</sup> and  
797 other ions in solution. Calculation of the true concentrations of species  
798 present in mixtures of associating ions. *Biochem J* **159**:1–5.
- 799 11. **Schneider DA, Gaal T, Gourse RL.** 2002. NTP-sensing by rRNA  
800 promoters in *Escherichia coli* is direct. *Proc Natl Acad Sci U S A* **99**:8602–7.
- 801 12. **Murray HD, Schneider DA, Gourse RL.** 2003. Control of rRNA  
802 expression by small molecules is dynamic and nonredundant. *Mol Cell*  
803 **12**:125–34.
- 804 13. **Pontes MH, Sevostyanova A, Groisman EA.** 2015. When too much ATP  
805 is bad for protein synthesis. *J Mol Biol* **427**:2586–2594.
- 806 14. **Gesteland RF.** 1966. Unfolding of *Escherichia coli* ribosomes by removal of  
807 magnesium. *J Mol Biol* **18**:356–71.
- 808 15. **Pontes MH, Groisman EA.** 2018. Protein synthesis controls phosphate  
809 homeostasis. *Genes Dev* **32**:79–92.
- 810 16. **Gillooly JF, Allen AP, Brown JH, Elser JJ, Martinez del Rio C, Savage**  
811 **VM, West GB, Woodruff WH, Woods HA.** 2005. The metabolic basis of  
812 whole-organism RNA and phosphorus content. *Proc Natl Acad Sci U S A*  
813 **102**:11923–7.
- 814 17. **Elser JJ, Acharya K, Kyle M, Cotner J, Makino W, Markow T, Watts T,**  
815 **Hobbie S, Fagan W, Schade J, Hood J, Sterner RW.** 2003. Growth rate-  
816 stoichiometry couplings in diverse biota. *Ecol Lett* **6**:936–943.



- 817 18. **Bremer H, Dennis PP.** 2008. Modulation of chemical composition and  
818 other parameters of the cell at different exponential growth rates. *EcoSal*  
819 *Plus* **3**.
- 820 19. **Soncini FC, García Véscovi E, Solomon F, Groisman EA.** 1996.  
821 Molecular basis of the magnesium deprivation response in *Salmonella*  
822 Typhimurium: Identification of PhoP-regulated genes. *J Bacteriol*  
823 **178**:5092–5099.
- 824 20. **Cromie MJ, Shi Y, Latifi T, Groisman EA.** 2006. An RNA sensor for  
825 intracellular Mg<sup>2+</sup>. *Cell* **125**:71–84.
- 826 21. **Spinelli SV, Pontel LB, García Véscovi E, Soncini FC.** 2008. Regulation  
827 of magnesium homeostasis in *Salmonella*: Mg<sup>2+</sup> targets the *mgtA* transcript  
828 for degradation by RNase E. *FEMS Microbiol Lett* **280**:226–234.
- 829 22. **Groisman EA, Hollands K, Kriner MA, Lee EJ, Park SY, Pontes MH.**  
830 2013. Bacterial Mg<sup>2+</sup> Homeostasis, Transport, and Virulence. *Annu Rev*  
831 *Genet* **47**:625–646.
- 832 23. **Snavely MD, Miller CG, Maguire ME.** 1991. The *mgtB* Mg<sup>2+</sup> transport  
833 locus of *Salmonella* Typhimurium encodes a P-type ATPase. *J Biol Chem*  
834 **266**:815–23.
- 835 24. **Tao T, Snavely MD, Farr SG, Maguire ME.** 1995. Magnesium transport  
836 in *Salmonella* Typhimurium: *mgtA* encodes a P-type ATPase and is  
837 regulated by Mg<sup>2+</sup> in a manner similar to that of the *mgtB* P-type ATPase.  
838 *J Bacteriol* **177**:2654–62.
- 839 25. **Lee EJ, Groisman EA.** 2012. Control of a *Salmonella* virulence locus by an

- 840 ATP-sensing leader messenger RNA. *Nature* **486**:271–275.
- 841 26. **Pontes MH, Yeom J, Groisman EA.** 2016. Reducing ribosome  
842 biosynthesis promotes translation during low Mg<sup>2+</sup> stress. *Mol Cell*  
843 **64**:480–492.
- 844 27. **Pontes MH, Lee EJ, Choi J, Groisman EA.** 2015. *Salmonella* promotes  
845 virulence by repressing cellulose production. *Proc Natl Acad Sci*  
846 **112**:5183–5188.
- 847 28. **Blanc-Potard AB, Groisman EA.** 1997. The *Salmonella selC* locus contains  
848 a pathogenicity island mediating intramacrophage survival. *EMBO J*  
849 **16**:5376–5385.
- 850 29. **Eriksson S, Lucchini S, Thompson A, Rhen M, Hinton J.** 2003.  
851 Unravelling the biology of macrophage infection by gene expression  
852 profiling of intracellular *Salmonella enterica*. *Mol Microbiol* **47**:103–118.
- 853 30. **Lee EJ, Pontes MH, Groisman EA.** 2013. A bacterial virulence protein  
854 promotes pathogenicity by inhibiting the bacterium' s own F<sub>1</sub>F<sub>o</sub> ATP  
855 synthase. *Cell* **154**:146–156.
- 856 31. **Okuno D, Iino R, Noji H.** 2011. Rotation and structure of FoF<sub>1</sub>-ATP  
857 synthase. *J Biochem* **149**:655–64.
- 858 32. **Rang C, Alix E, Felix C, Heitz A, Tasse L, Blanc-Potard AB.** 2007. Dual  
859 role of the MgtC virulence factor in host and non-host environments. *Mol*  
860 *Microbiol* **63**:605–622.
- 861 33. **Aung K, Lin S, Wu C, Huang Y, Su C, Chiou T.** 2006. *pho2*, a phosphate  
862 overaccumulator, is caused by a nonsense mutation in a microRNA399

- 863 target gene. *Plant Physiol* **141**:1000–11.
- 864 34. **Nguyen TT, Quan X, Hwang KH, Xu S, Das R, Choi SK, Wiederkehr A,**  
865 **Wollheim CB, Cha SK, Park KS.** 2015. Mitochondrial oxidative stress  
866 mediates high-phosphate-induced secretory defects and apoptosis in  
867 insulin-secreting cells. *Am J Physiol - Endocrinol Metab* **308**:E933–E941.
- 868 35. **Luan M, Zhao F, Han X, Sun G, Yang Y, Liu J, Shi J, Fu A, Lan W, Luan**  
869 **S.** 2019. Vacuolar phosphate transporters contribute to systemic  
870 phosphate homeostasis vital for reproductive development in *Arabidopsis*.  
871 *Plant Physiol* **179**:640–655.
- 872 36. **Razzaque MS.** 2011. Phosphate toxicity: New insights into an old  
873 problem. *Clin Sci* **120**:91–97.
- 874 37. **Lee EJ, Groisman EA.** 2012. Tandem attenuators control expression of the  
875 *Salmonella* *mgtCBR* virulence operon. *Mol Microbiol* **86**:212–224.
- 876 38. **Sevostyanova A, Groisman EA.** 2015. An RNA motif advances  
877 transcription by preventing Rho-dependent termination. *Proc Natl Acad*  
878 *Sci U S A* **112**:E6835–E6843.
- 879 39. **Park M, Nam D, Kweon D-H, Shin D.** 2018. ATP reduction by MgtC and  
880 Mg<sup>2+</sup> homeostasis by MgtA and MgtB enables *Salmonella* to accumulate  
881 RpoS upon low cytoplasmic Mg<sup>2+</sup> stress. *Mol Microbiol* **110**:283–295.
- 882 40. **Park M, Kim H, Nam D, Kweon D, Shin D.** 2019. The *mgtCBR* mRNA  
883 leader secures growth of *Salmonella* in both host and non-host  
884 environments. *Front Microbiol* **10**:1–12.
- 885 41. **Senior AE.** 1990. The proton-translocating ATPase of *Escherichia coli*.

- 886           Annu Rev Biophys Biophys Chem **19**.
- 887   42.   **Harold FM, Maloney PC.** 1996. Energy transduction by ion currents, p.  
888       283–306. *In* Neidhardt, FC, Curtiss, R, Ingraham, JL, Lin, ECC, Low, KB,  
889       Magasanik, WS, Reznikoff, WS, Riley, M, Scharchter, M, Umberger, HE  
890       (eds.), *Escherichia coli* and *Salmonella*: Cellular and Molecular Biology, 2nd  
891       ed. American Society for Microbiology, Washington D.C.
- 892   43.   **Butlin JD, Cox GB, Gibson F.** 1973. Oxidative phosphorylation in  
893       *Escherichia coli* K-12: the genetic and biochemical characterisations of a  
894       strain carrying a mutation in the *uncB* gene. *Biochim Biophys Acta*  
895       **292**:366–375.
- 896   44.   **Murarka A, Dharmadi Y, Yazdani SS, Gonzalez R.** 2008. Fermentative  
897       utilization of glycerol by *Escherichia coli* and its implications for the  
898       production of fuels and chemicals. *Appl Environ Microbiol* **74**:1124–1135.
- 899   45.   **Richter K, Gescher J.** 2014. Accelerated glycerol fermentation in  
900       *Escherichia coli* using methanogenic formate consumption. *Bioresour*  
901       *Technol* **162**:389–91.
- 902   46.   **Marr AG.** 1991. Growth rate of *Escherichia coli*. *Microbiol Rev* **55**:316–333.
- 903   47.   **Russell JB, Cook GM.** 1995. Energetics of bacterial growth: Balance of  
904       anabolic and catabolic reactions. *Microbiol Rev* **59**:48–62.
- 905   48.   **Madigan MT, Martinko JM, Bender KS, Buckley DH, Stahl DA.** 2015.  
906       Microbial Metabolism, p. 73–96. *In* Brock Biology of Microorganisms, 14th  
907       ed. Pearson, Upper Saddle River, NJ.
- 908   49.   **Rosenberg H, Gerdes RG, Chegwidden K.** 1977. Two systems for the

- 909 uptake of phosphate in *Escherichia coli*. J Bacteriol **131**:505–511.
- 910 50. **van Veen HW, Abee T, Kortstee GJ, Konings WN, Zehnder AJ.** 1994.  
911 Translocation of metal phosphate via the phosphate inorganic transport  
912 system of *Escherichia coli*. Biochemistry **33**:1766–70.
- 913 51. **Harris RM, Webb DC, Howitt SM, Cox GB.** 2001. Characterization of  
914 PitA and PitB from *Escherichia coli*. J Bacteriol **183**:5008–5014.
- 915 52. **Cox GB, Webb D, Rosenberg H.** 1989. Specific amino acid residues in  
916 both the PstB and PstC proteins are required for phosphate transport by  
917 the *Escherichia coli* Pst system. J Bacteriol **171**:1531–4.
- 918 53. **Motomura K, Hirota R, Ohnaka N, Okada M, Ikeda T, Morohoshi T,**  
919 **Ohtake H, Kuroda A.** 2011. Overproduction of YjbB reduces the level of  
920 polyphosphate in *Escherichia coli*: A hypothetical role of YjbB in phosphate  
921 export and polyphosphate accumulation. FEMS Microbiol Lett **320**:25–32.
- 922 54. **Gardner SG, Johns KD, Tanner R, McCleary WR.** 2014. The PhoU  
923 protein from *Escherichia coli* interacts with PhoR, PstB, and metals to form  
924 a phosphate-signaling complex at the membrane. J Bacteriol **196**:1741–  
925 1752.
- 926 55. **Wanner BL.** 1986. Novel regulatory mutants of the phosphate regulon in  
927 *Escherichia coli* K-12. J Mol Biol **191**:39–58.
- 928 56. **Cromie MJ, Groisman EA.** 2010. Promoter and riboswitch control of the  
929 Mg<sup>2+</sup> transporter MgtA from *Salmonella enterica*. J Bacteriol **192**:604–7.
- 930 57. **Hoffer SM, Schoondermark P, Van Veen HW, Tommassen J.** 2001.  
931 Activation by gene amplification of *pitB*, encoding a third phosphate

- 932 transporter of *Escherichia coli* K-12. J Bacteriol **183**:4659–4663.
- 933 58. **Hoffer SM, Tommassen J.** 2001. The phosphate-binding protein of  
934 *Escherichia coli* is not essential for Pi-regulated expression of the Pho  
935 regulon. J Bacteriol **183**:5768–5771.
- 936 59. **Buchmeier N, Blanc-Potard AB, Ehrh S, Piddington D, Riley L,**  
937 **Groisman EA.** 2000. A parallel intraphagosomal survival strategy shared  
938 by *Mycobacterium tuberculosis* and *Salmonella enterica*. Mol Microbiol  
939 **35**:1375–1382.
- 940 60. **Lavigne J, O’Callaghan D, Blanc-Potard AB.** 2005. Requirement of MgtC  
941 for *Brucella suis* intramacrophage growth: a potential mechanism shared  
942 by *Salmonella enterica* and *Mycobacterium tuberculosis* for adaptation to a  
943 low-Mg<sup>2+</sup> environment. Infect Immun **73**:3160–3163.
- 944 61. **Maloney KE, Valvano MA.** 2006. The *mgtC* gene of *Burkholderia*  
945 *cenocepacia* is required for growth under magnesium limitation conditions  
946 and intracellular survival in macrophages. Infect Immun **74**:5477–5486.
- 947 62. **Belon C, Gannoun-Zaki L, Lutfalla G, Kremer L, Blanc-Potard AB.** 2014.  
948 *Mycobacterium marinum* MgtC plays a role in phagocytosis but is  
949 dispensable for intracellular multiplication. PLoS One **9**:1–23.
- 950 63. **Belon C, Soscia C, Bernut A, Laubier A, Bleves S, Blanc-Potard AB.**  
951 2015. A macrophage subversion factor is shared by intracellular and  
952 extracellular pathogens. PLoS Pathog **1**–24.
- 953 64. **Le Moigne V, Belon C, Goulard C, Accard G, Bernut A, Pitard B,**  
954 **Gaillard JL, Kremer L, Herrmann JL, Blanc-Potard AB.** 2016. MgtC as a

- 955 host-induced factor and vaccine candidate against *Mycobacterium*  
956 *abscessus* infection. *Infect Immun* **84**:2895–2903.
- 957 65. **Cafiero JH, Lamberti YA, Surmann K, Vecerek B, Rodriguez ME.** 2018.  
958 *A Bordetella pertussis* MgtC homolog plays a role in the intracellular  
959 survival. *PLoS One* **13**:1–17.
- 960 66. **Jackson RJ, Binet MRB, Lee LJ, Ma R, Graham AI, McLeod CW, Poole**  
961 **RK.** 2008. Expression of the PitA phosphate/metal transporter of  
962 *Escherichia coli* is responsive to zinc and inorganic phosphate levels. *FEMS*  
963 *Microbiol Lett* **289**:219–24.
- 964 67. **Yin X, Wu Orr M, Wang H, Hobbs EC, Shabalina SA, Storz G.** 2019. The  
965 small protein MgtS and small RNA MgrR modulate the PitA phosphate  
966 symporter to boost intracellular magnesium levels. *Mol Microbiol*  
967 **111**:131–144.
- 968 68. **Srikumar S, Kröger C, Hébrard M, Colgan A, Owen S V, Sivasankaran**  
969 **SK, Cameron ADS, Hokamp K, Hinton J.** 2015. RNA-seq brings new  
970 insights to the intra-macrophage transcriptome of *Salmonella*  
971 *Typhimurium*. *PLoS Pathog* **11**:e1005262.
- 972 69. **Perez JC, Shin D, Zwir I, Latifi T, Hadley TJ, Groisman EA.** 2009.  
973 Evolution of a bacterial regulon controlling virulence and Mg<sup>2+</sup>  
974 homeostasis. *PLoS Genet* **5**:e1000428.
- 975 70. **Beard SJ, Hashim R, Wu G, Binet MR, Hughes MN, Poole RK.** 2000.  
976 Evidence for the transport of zinc(II) ions via the Pit inorganic phosphate  
977 transport system in *Escherichia coli*. *FEMS Microbiol Lett* **184**:231–5.

- 978 71. **Dudev T, Lim C.** 2003. Principles governing Mg, Ca, and Zn binding and  
979 selectivity in proteins. *Chem Rev* **103**:773–787.
- 980 72. **Foster AW, Osman D, Robinson NJ.** 2014. Metal preferences and  
981 metallation. *J Biol Chem* **289**:28095–103.
- 982 73. **Jensen LT, Ajua-Alemanji M, Culotta VC.** 2003. The *Saccharomyces*  
983 *cerevisiae* high affinity phosphate transporter encoded by PHO84 also  
984 functions in manganese homeostasis. *J Biol Chem* **278**:42036–42040.
- 985 74. **Rosenfeld L, Reddi AR, Leung E, Aranda K, Jensen LT, Culotta VC.**  
986 2010. The effect of phosphate accumulation on metal ion homeostasis in  
987 *Saccharomyces cerevisiae*. *J Biol Inorg Chem* **15**:1051–1062.
- 988 75. **Rosenfeld L, Culotta VC.** 2012. Phosphate disruption and metal toxicity  
989 in *Saccharomyces cerevisiae*: Effects of RAD23 and the histone chaperone  
990 HPC2. *Biochem Biophys Res Commun* **418**:414–419.
- 991 76. **Ofiteru AM, Ruta LL, Rotaru C, Dumitru I, Ene CD, Neagoe A,**  
992 **Farcasanu IC.** 2012. Overexpression of the PHO84 gene causes heavy  
993 metal accumulation and induces Ire1p-dependent unfolded protein  
994 response in *Saccharomyces cerevisiae* cells. *Appl Microbiol Biotechnol*  
995 **94**:425–435.
- 996 77. **Choi S, Choi E, Cho Y, Nam D, Lee J, Lee EJ.** 2019. The *Salmonella*  
997 virulence protein MgtC promotes phosphate uptake inside macrophages.  
998 *Nat Commun* **10**:3326.
- 999 78. **Papp-Wallace KM, Nartea M, Kehres DG, Porwollik S, McClelland M,**  
1000 **Libby SJ, Fang FC, Maguire ME.** 2008. The CorA Mg<sup>2+</sup> channel is



- 1001 required for the virulence of *Salmonella enterica* serovar Typhimurium. J  
1002 Bacteriol **190**:6517–6523.
- 1003 79. **Rudat AK, Pokhrel A, Green TJ, Gray MJ.** 2018. Mutations in *Escherichia*  
1004 *coli* polyphosphate kinase that lead to dramatically increased *in vivo*  
1005 polyphosphate levels. J Bacteriol **200**.
- 1006 80. **Li Y, Rahman SM, Li G, Fowle W, Nielsen PH, Gu AZ.** 2019. The  
1007 composition and implications of polyphosphate-metal in enhanced  
1008 biological phosphorus removal systems. Environ Sci Technol **53**:1536–  
1009 1544.
- 1010 81. **Datta S, Costantino N, Court DL.** 2006. A set of recombineering plasmids  
1011 for gram-negative bacteria. Gene **379**:109–115.
- 1012 82. **Davis R, Bolstein D, Roth J.** 1980. Advanced Bacterial Genetics. Cold  
1013 Spring Harbor Lab Press, Cold Spring Harbor, NY.
- 1014 83. **Neidhardt FC, Bloch PL, Smith DF.** 1974. Culture medium for  
1015 enterobacteria. J Bacteriol **119**:736–747.
- 1016 84. **García Vescovi E, Soncini FC, Groisman EA.** 1996. Mg<sup>2+</sup> as an  
1017 extracellular signal: environmental regulation of *Salmonella* virulence. Cell  
1018 **84**:165–174.
- 1019 85. **Kanno S, Cuyas L, Javot H, Bligny R, Gout E, Darteville T, Hanchi M,**  
1020 **Nakanishi T, Thibaud M, Nussaume L.** 2016. Performance and  
1021 limitations of phosphate quantification: guidelines for plant biologists.  
1022 Plant Cell Physiol **57**.
- 1023 86. **Soncini FC, García Vescovi E, Groisman EA.** 1995. Transcriptional

- 1024 autoregulation of the *Salmonella* Typhimurium *phoPQ* operon. J Bacteriol  
1025 177:4364–4371.
- 1026 87. **Lee TS, Krupa RA, Zhang F, Hajimorad M, Holtz WJ, Prasad N, Lee SK,**  
1027 **Keasling JD.** 2011. BglBrick vectors and datasheets: A synthetic biology  
1028 platform for gene expression. J Biol Eng 5:12.
- 1029 88. **Chang AC, Cohen SN.** 1978. Construction and characterization of  
1030 amplifiable multicopy DNA cloning vehicles derived from the P15A  
1031 cryptic miniplasmid. J Bacteriol 134:1141–56.
- 1032 89. **Khetrupal V, Mehershahi K, Rafee S, Chen S, Lim CL, Chen SL.** 2015. A  
1033 set of powerful negative selection systems for unmodified  
1034 Enterobacteriaceae. Nucleic Acids Res 43:e83.
- 1035 90. **Moncrief MBC, Maguire ME.** 1998. Magnesium and the role of *mgtC* in  
1036 growth of *Salmonella* Typhimurium. Infect Immun 66:3802–3809.
- 1037 91. **Schneider CA, Rasband WS, Eliceiri KW.** 2012. NIH Image to ImageJ: 25  
1038 years of image analysis. Nat Methods 9:671–5.
- 1039 92. **Blattner FR, Plunkett G, Bloch CA, Perna NT, Burland V, Riley M,**  
1040 **Collado-Vides J, Glasner JD, Rode CK, Mayhew GF, Gregor J, Davis**  
1041 **NW, Kirkpatrick HA, Goeden MA, Rose DJ, Mau B, Shao Y.** 1997. The  
1042 complete genome sequence of *Escherichia coli* K-12. Science (80) 277:1453–  
1043 1462.
- 1044 93. **Fields PI, Swanson RV, Haidaris CG, Heffron F.** 1986. Mutants of  
1045 *Salmonella* Typhimurium that cannot survive within the macrophage are  
1046 avirulent. Proc Natl Acad Sci U S A 83:5189–5193.

- 1047 94. **Cherepanov PP, Wackernagel W.** 1995. Gene disruption in *Escherichia*  
1048 *coli*: Tc<sup>R</sup> and Km<sup>R</sup> cassettes with the option of Flp-catalyzed excision of the  
1049 antibiotic-resistance determinant. *Gene* **158**:9–14.
- 1050 95. **Datsenko KA, Wanner BL.** 2000. One-step inactivation of chromosomal  
1051 genes in *Escherichia coli* K-12 using PCR products. *Proc Natl Acad Sci U S*  
1052 *A* **97**:6640–5.
- 1053 96. **Pontes MH, Groisman EA.** 2019. Slow growth determines nonheritable  
1054 antibiotic resistance in *Salmonella enterica*. *Sci Signal* **12**.
- 1055 97. **Chamngopol S, Groisman EA.** 2002. Mg<sup>2+</sup> homeostasis and avoidance  
1056 of metal toxicity. *Mol Microbiol* **44**:561–571.
- 1057 98. **Wösten M, Kox L, Chamngopol S, Soncini FC, Groisman EA.** 2000. A  
1058 signal transduction system that responds to extracellular iron. *Cell*  
1059 **103**:113–25.
- 1060 99. **Andersen JB, Sternberg C, Poulsen LK, Bjørn SP, Givskov M, Molin S,**  
1061 **Bjørn SP, Givskov M, Molin S.** 1998. New unstable variants of green  
1062 fluorescent protein for studies of transient gene expression in bacteria.  
1063 *Appl Environ Microbiol* **64**:2240–2246.
- 1064

1065 **Figures and Tables**

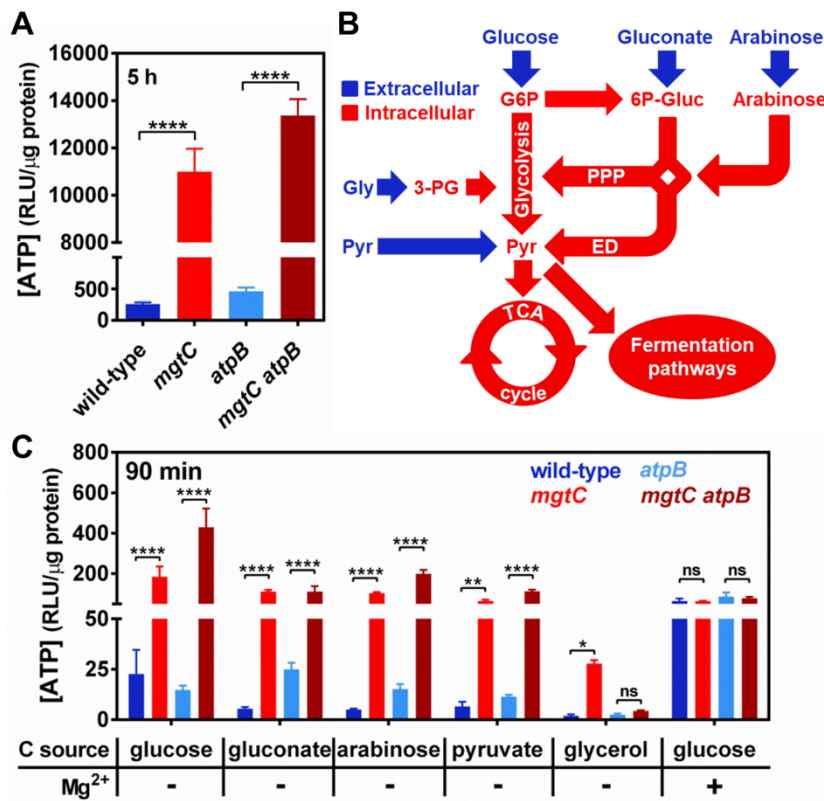

1066

1067 **Figure 1. F<sub>1</sub>F<sub>0</sub> synthase-independent ATP accumulation in an *mgtC* mutant**  
 1068 **during cytoplasmic Mg<sup>2+</sup> starvation.** (A) Intracellular ATP levels in wild-type  
 1069 (14028s), *mgtC* (EL4), *atpB* (MP24) or *mgtC atpB* (MP25) *Salmonella* following 5 h  
 1070 of growth. Cells were grown in MOPS medium containing 10 μM MgCl<sub>2</sub> and 2  
 1071 mM K<sub>2</sub>HPO<sub>4</sub>. (B) Schematic representation of carbon flow through the central  
 1072 metabolic pathways in bacteria with key extracellular (blue) and intracellular  
 1073 (red) metabolites. G6P, glucose-6-phosphate; 6P-Gluc, 6-Phosphogluconate;  
 1074 Gly, glycerol; Pyr, pyruvate; PPP, pentose phosphate pathway; ED, Entner–  
 1075 Doudoroff pathway. (C) Intracellular ATP levels in wild-type (14028s), *mgtC*  
 1076 (EL4), *atpB* (MP24) or *mgtC atpB* (MP25) *Salmonella*. Cells were grown in MOPS  
 1077 medium containing 10 mM MgCl<sub>2</sub>, 2 mM K<sub>2</sub>HPO<sub>4</sub> and 25 mM glucose until  
 1078 OD<sub>600</sub> ≈ 0.4, washed thrice, and grown for additional 90 min in MOPS medium  
 1079 supplemented with the indicated carbon source (25 mM glucose, 25 mM

1080 sodium gluconate, 30 mM L-arabinose, 50 mM sodium pyruvate, or 50 mM  
1081 glycerol), and containing 2 mM K<sub>2</sub>HPO<sub>4</sub> and either 0 (-) or 10 (+) mM MgCl<sub>2</sub>.  
1082 Means ± SDs of three independent experiments are shown. \*P < 0.05, \*\*P < 0.01,  
1083 \*\*\*\*P < 0.0001, and ns, no significant difference. Two-tailed *t* test (A); two-way  
1084 analysis of variance (ANOVA) with Tukey correction (C).

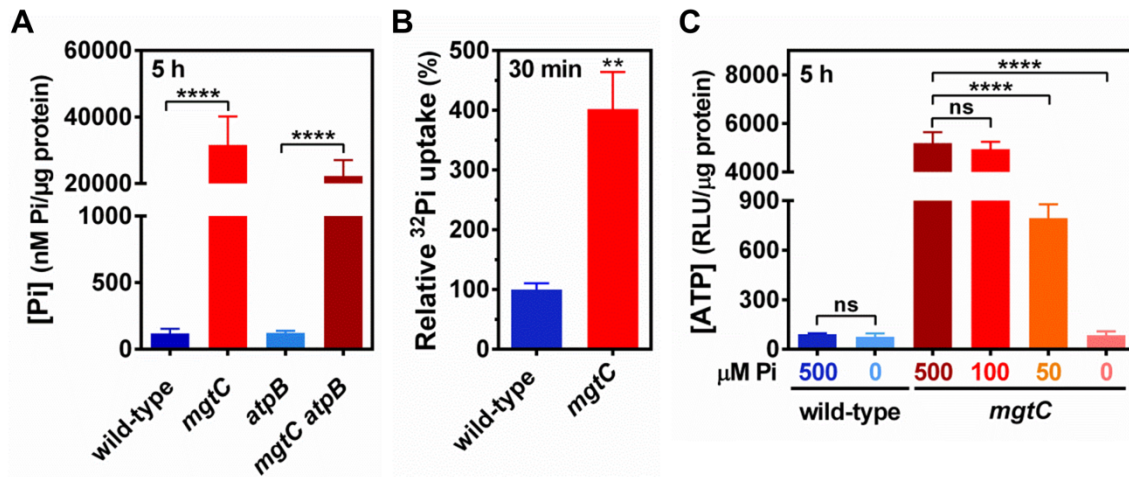

1085

1086 **Figure 2. MgtC-dependent inhibition of Pi transport and assimilation into**

1087 **ATP during cytoplasmic Mg<sup>2+</sup> starvation.** (A) Total intracellular Pi in wild-

1088 type (14028s), *mgtC* (EL4), *atpB* (MP24) or *mgtC atpB* (MP25) *Salmonella*

1089 following 5 h of growth in MOPS medium containing 10 μM MgCl<sub>2</sub> and 2 mM

1090 K<sub>2</sub>HPO<sub>4</sub>. (B) Relative radioactive orthophosphate (<sup>32</sup>Pi) uptake in wild-type

1091 (14028s) or *mgtC* (EL4) cells. Bacteria were grown in MOPS medium containing

1092 10 μM MgCl<sub>2</sub> and 500 μM K<sub>2</sub>HPO<sub>4</sub> during 3 h before the addition of <sup>32</sup>Pi to the

1093 cultures. Levels of <sup>32</sup>Pi accumulated in cells were determined after 30 min of

1094 labeling by liquid scintillation counting, as described in Materials and Methods.

1095 <sup>32</sup>Pi uptake values were normalized against the wild-type strain. (C)

1096 Intracellular ATP levels in wild-type (14028s) or *mgtC* (EL4) *Salmonella*

1097 following 5 h of growth in MOPS medium containing 10 μM MgCl<sub>2</sub> and the

1098 indicated concentration of K<sub>2</sub>HPO<sub>4</sub> (μM Pi). Means ± SDs of at least three

1099 independent experiments are shown. \*\*P < 0.01, \*\*\*\*P < 0.0001, and ns, no

1100 significant difference. Two-tailed *t* tests (A-C).



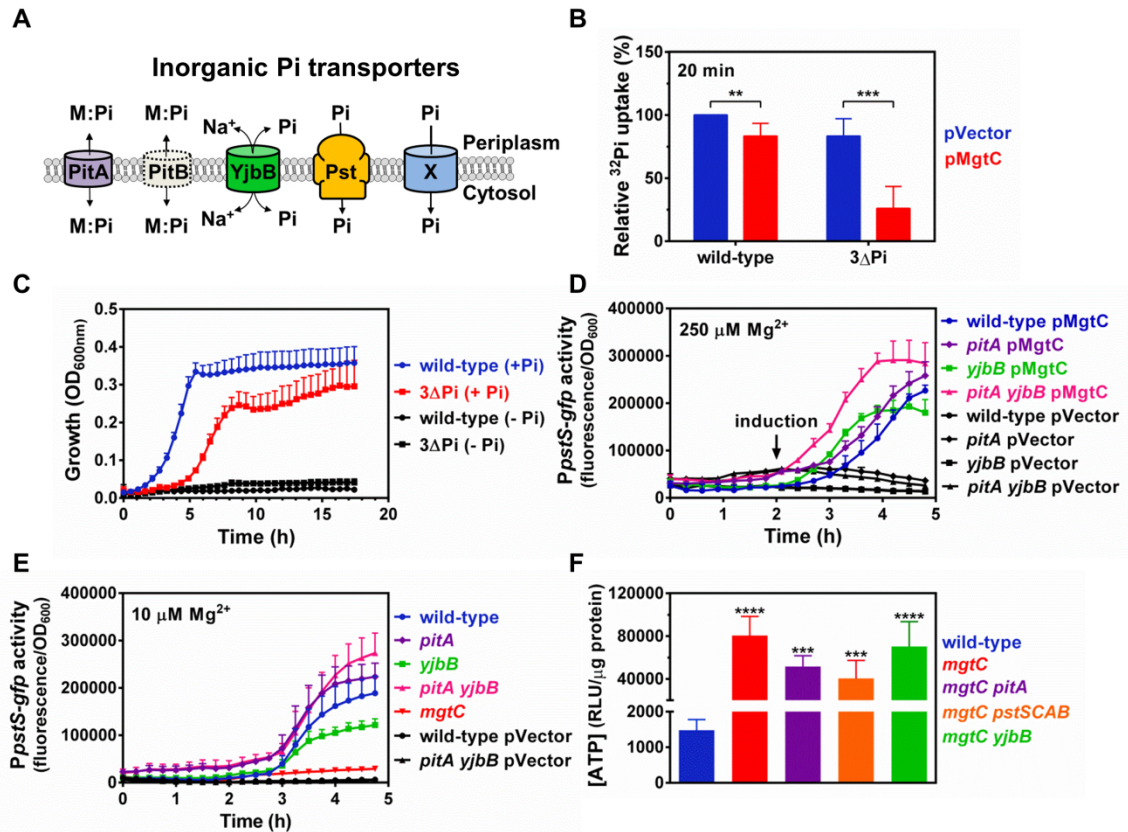

1101

1102 **Figure 3. A non-canonical Pi transport system is inhibited by MgtC. (A)**

1103 Schematic representation of inorganic Pi transporters harbored by *Salmonella*

1104 *enterica* and *Escherichia coli*. Note that PitB (grey, dashed outline) is absent from

1105 *Salmonella*. M:Pi, metal-phosphate complex; X, inferred, uncharacterized Pi

1106 transporter inhibited by MgtC. (B) Relative <sup>32</sup>Pi uptake in wild-type (14028s) or

1107  $\Delta$ 3Pi (RB39) carrying either pVector (pUHE-21) or pMgtC (pUHE-MgtC).

1108 Bacteria were grown in MOPS medium containing 250  $\mu$ M MgCl<sub>2</sub> and 500  $\mu$ M

1109 K<sub>2</sub>HPO<sub>4</sub> until OD<sub>600</sub>  $\approx$  0.2. Cultures were then propagated for 15 min in the

1110 presence of 750  $\mu$ M isopropyl  $\beta$ -d-1-thiogalactopyranoside (IPTG) prior to the

1111 addition of <sup>32</sup>Pi. Transport of <sup>32</sup>Pi was allowed to take place for 20 min.

1112 Intracellular <sup>32</sup>Pi accumulation was determined by liquid scintillation counting,

1113 as described in Materials and Methods. <sup>32</sup>Pi uptake values were normalized

1114 against the wild-type pVector strain. \*\*P < 0.01, \*\*\*P < 0.001, unpaired two



1115 tailed *t* test. (C) Growth curve of wild-type (14028s) or  $\Delta 3\text{Pi}$  (RB39) *Salmonella*.  
1116 Cells were grown in MOPS medium containing 10 mM  $\text{MgCl}_2$  and either  
1117 0 (-Pi) or 500 (+Pi)  $\mu\text{M}$  of  $\text{K}_2\text{HPO}_4$ . (D) Fluorescence from wild-type (14028s),  
1118 *pitA* (MP1251), *yjbB* (MP1252), *pitA yjbB* (MP1479p) *Salmonella* carrying pPpstS-  
1119 GFPc and either pVector or pMgtC. Cells were grown in MOPS medium  
1120 containing 250  $\mu\text{M}$   $\text{MgCl}_2$  and 500  $\mu\text{M}$   $\text{K}_2\text{HPO}_4$ . 250  $\mu\text{M}$  of IPTG were added  
1121 after 2 h of growth. (E) Fluorescence from wild-type (14028s), *pitA* (MP1251),  
1122 *yjbB* (MP1252), *pitA yjbB* (MP1479p), *mgtC* (EL4) *Salmonella* carrying pPpstS-  
1123 GFPc or pVector (the promoterless GFP plasmid pGFPc). Cells were grown in  
1124 MOPS medium containing 10  $\mu\text{M}$   $\text{MgCl}_2$  and 500  $\mu\text{M}$   $\text{K}_2\text{HPO}_4$ . (F) Intracellular  
1125 ATP levels in wild-type (14028s), *mgtC* (EL4), *mgtC pitA* (MP1254), *mgtC*  
1126 *pstSCAB* (MP1720) or *mgtC yjbB* (MP1255) *Salmonella* following 5 h of growth.  
1127 Cells were grown in MOPS medium containing 10  $\mu\text{M}$   $\text{MgCl}_2$  and 2 mM  
1128  $\text{K}_2\text{HPO}_4$ . \*\*\* $P < 0.001$ , \*\*\*\* $P < 0.0001$ , unpaired two-tailed *t* tests against the  
1129 wild-type strain. For all graphs (B-F), means  $\pm$  SDs of at least three independent  
1130 experiments are shown.

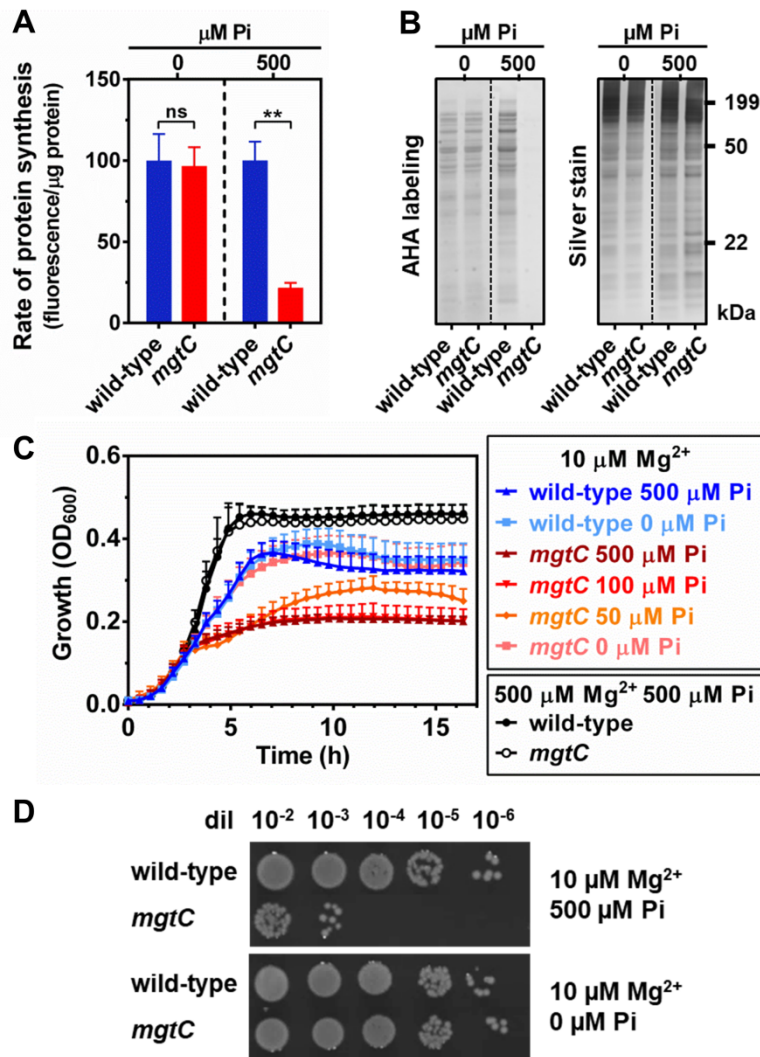

1131

1132 **Figure 4. Effect of phosphate limitation on the translation rate, growth and**  
 1133 **viability of an *mgtC* mutant during cytosolic Mg<sup>2+</sup> starvation. (A)**

1134 Quantification and (B) SDS-PAGE analysis of the rate of protein synthesis [L-  
 1135 azidohomoalanine (AHA) labeling] of wild-type or *mgtC* (EL4) *Salmonella*. Cells  
 1136 were grown in MOPS medium containing 10 mM MgCl<sub>2</sub> and 2 mM K<sub>2</sub>HPO<sub>4</sub>  
 1137 until OD<sub>600</sub> ≈ 0.4. Cells were subsequently washed thrice with MOPS medium  
 1138 lacking MgCl<sub>2</sub>, K<sub>2</sub>HPO<sub>4</sub> and amino acids, and grown for additional 90 min in  
 1139 MOPS medium lacking methionine, and containing 10 μM MgCl<sub>2</sub> plus the  
 1140 indicated concentration of K<sub>2</sub>HPO<sub>4</sub> (μM Pi). Means ± SDs of four independent  
 1141 experiments are shown. The gel is representative of four independent  
 1142 experiments. Samples from 0 and 500 μM Pi were resolved and imaged from

1143 different gels (indicated by dashed lines). (C) Growth curve of wild-type  
1144 (14028s) or *mgtC* (EL4) *Salmonella*. Cells were grown in MOPS medium  
1145 containing the indicated concentrations of MgCl<sub>2</sub> and K<sub>2</sub>HPO<sub>4</sub>. Means ± SDs of  
1146 three independent experiments are shown. (D) Viable cell count of wild-type  
1147 (14028s) or *mgtC* (EL4) *Salmonella* following 16 h of growth in MOPS medium  
1148 containing 10 μM MgCl<sub>2</sub> and 0 or 500 μM K<sub>2</sub>HPO<sub>4</sub>. Cell suspensions were  
1149 normalized to the same OD<sub>600</sub>, diluted, and 5 μL were spotted on plates. Images  
1150 were taken after incubation of plates at 37°C for 18 h, and are representative of  
1151 three independent experiments.

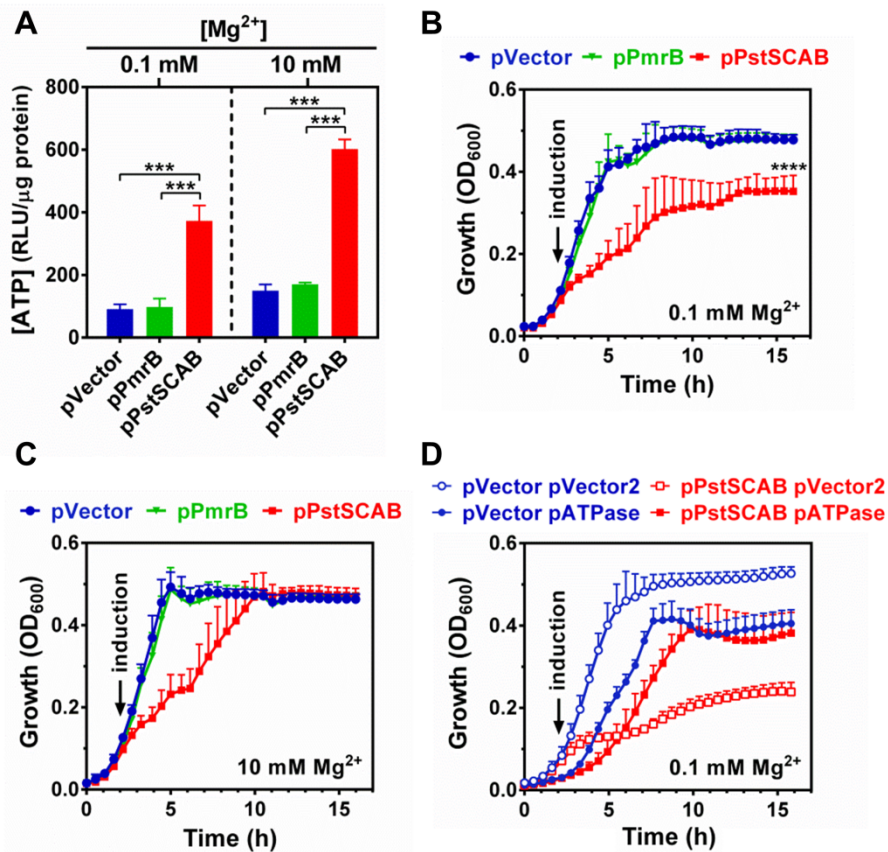

1152

1153 **Figure 5. Effect of PstSCAB on growth, P assimilation and Mg<sup>2+</sup> homeostasis.**

1154 (A) Intracellular ATP levels of cultures depicted in (B-C). Measurements were

1155 conducted at 5 h of growth. (B-C) Growth curves of wild-type (14028s)

1156 *Salmonella* carrying pVector (pUHE-21), pPstSCAB (pUHE-PstSCAB), or pPmrB

1157 (pUHE-PmrB) in MOPS medium containing 0.1 (B) and 10 mM MgCl<sub>2</sub> (C). (D)

1158 Growth curve of wild-type (14028s) *Salmonella* carrying either pVector or

1159 pPstSCAB, and either pVector2 (pBbB2K-GFP) or pATPase (pBbB2K-AtpAGD).

1160 In all experiments, cells were grown in MOPS medium containing 10 mM

1161 K<sub>2</sub>HPO<sub>4</sub> and the indicated MgCl<sub>2</sub> concentration. Ectopic protein expressions

1162 were induced by adding 250 μM IPTG to the cultures after 2 h of growth.

1163 Means ± SDs of three independent experiments are shown. (A-B) \*\*\*P < 0.001,

1164 \*\*\*\*P < 0.0001, unpaired two tailed *t* test against pVector.

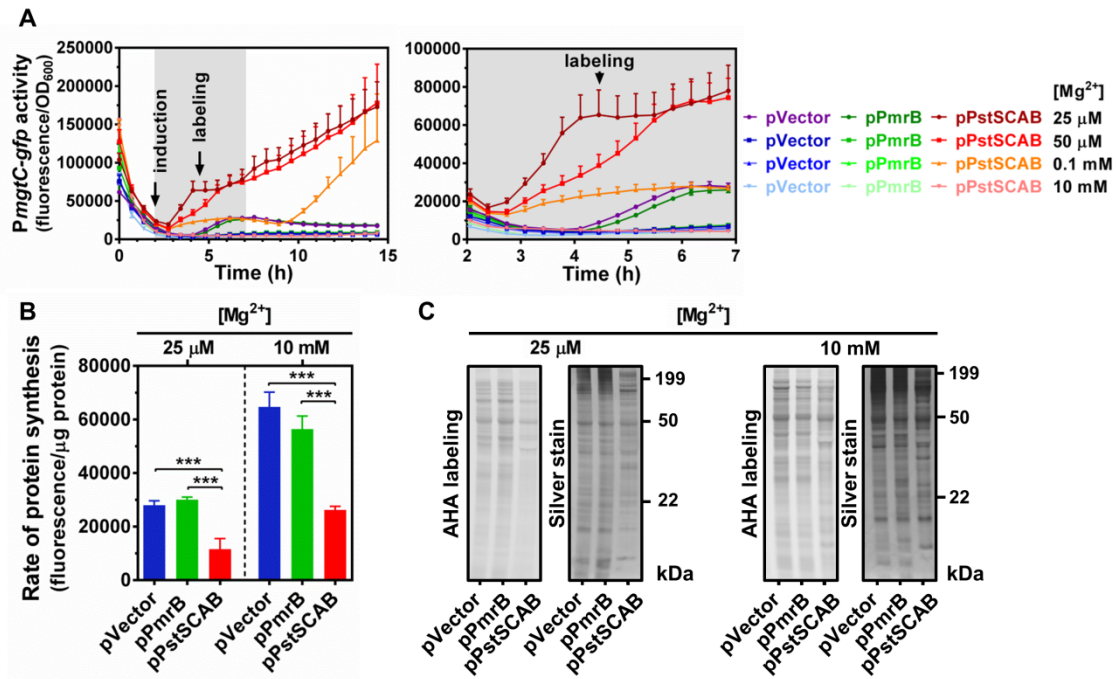

1165

1166 **Figure 6. Effect of PstSCAB expression on *mgtC* transcription and cellular**  
 1167 **translation rates during growth under conditions of moderate and high  $Mg^{2+}$ .**

1168 (A) Fluorescence from wild-type (14028s) *Salmonella* carrying transcriptional  
 1169 reporter pPmgfC-GFPc and either pVector (pUHE-21), pPstSCAB (pUHE-  
 1170 PstSCAB), or pPmrB (pUHE-PmrB). Full time course (left hand-side panel) and  
 1171 inset between 2 and 7 h (right hand-side panel) of the experiments are shown.

1172 (B) Quantification and (C) SDS-PAGE analysis of the rate of protein synthesis  
 1173 [L-azidohomoalanine (AHA) labeling] of wild-type (14028s) *Salmonella* carrying  
 1174 either pVector, pPmrB or pPstSCAB. In all experiments, cells were grown in  
 1175 MOPS medium containing 10 mM  $K_2HPO_4$  and the indicated concentration of  
 1176  $MgCl_2$ . For AHA labeling, bacteria were cultured in MOPS medium lacking  
 1177 methionine (see Materials and Methods). 250  $\mu M$  IPTG was added to the  
 1178 cultures following 2 h of growth. AHA was incorporated to the cultures at 4.5  
 1179 h. Means  $\pm$  SDs of three independent experiments are shown. Gels are  
 1180 representative of three independent experiments. \*\*\*P < 0.001, unpaired two  
 1181 tailed *t* test against pVector.



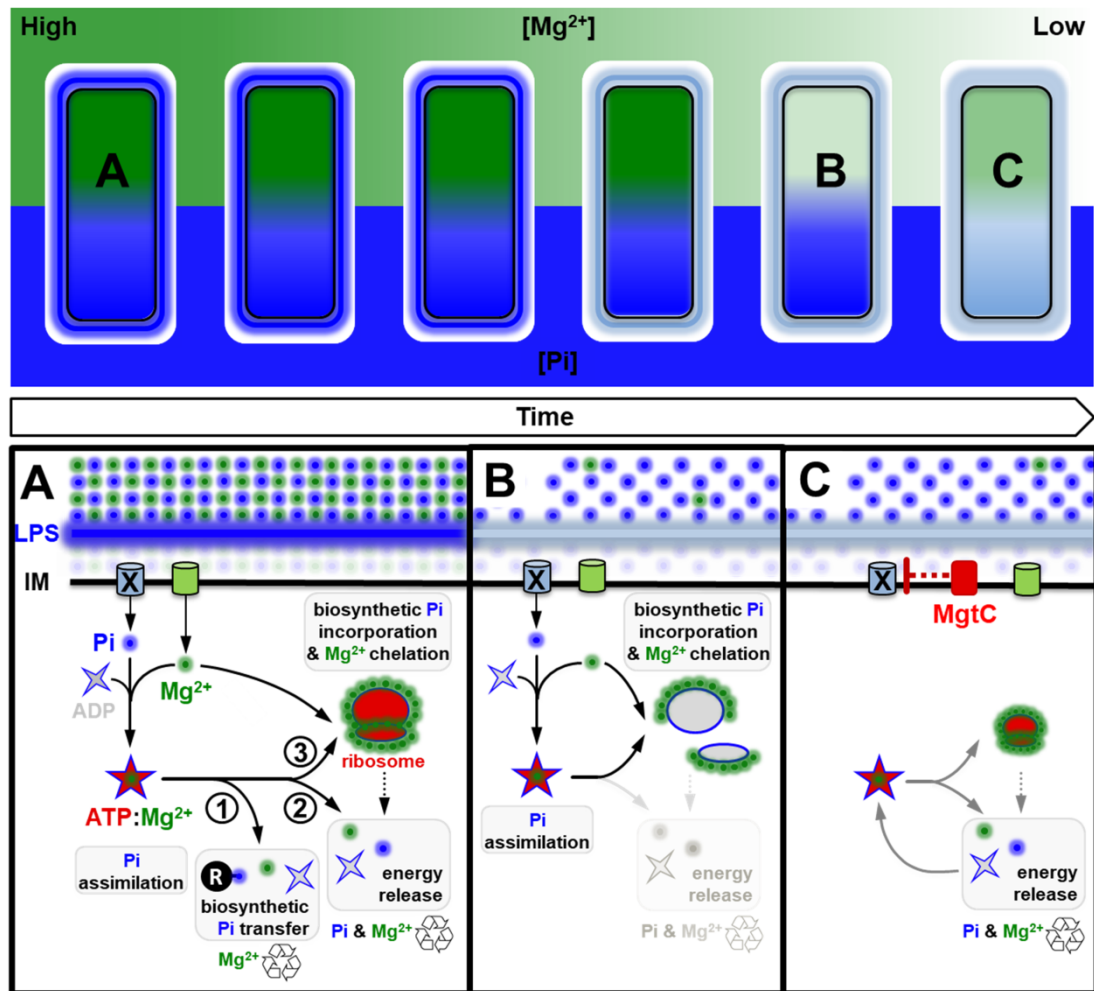

1182

1183 **Figure 7. Model illustrating how limitation of phosphate assimilation**  
1184 **maintains cytoplasmic  $Mg^{2+}$  homeostasis in *Salmonella enterica*.** Top panel:  
1185 Overview of the temporal adaptation of *Salmonella enterica* to  $Mg^{2+}$  starvation.  
1186  $Mg^{2+}$  (green) and  $Pi$  (blue) concentrations in the environment,  
1187 lipopolysaccharide (LPS) and cytoplasm are depicted as gradients with dark  
1188 colors denoting high concentration and light colors representing low  
1189 concentrations. Bottom panel: Schematic depicting molecular events and  
1190 responses underlying the adaptation. (A) During homeostasis,  $Pi$  is imported  
1191 into the cytoplasm through dedicated inner membrane (IM) transport systems  
1192 [X (unknown transporter) and PitA]. Cells assimilate imported  $Pi$  through the  
1193 synthesis of ATP, which exists as a salt with positively charged  $Mg^{2+}$

1194 (ATP:Mg<sup>2+</sup>). ATP:Mg<sup>2+</sup> mediates the (1) transfer of Pi among biological  
1195 molecules, (2) powers energy-dependent enzymatic reactions, and (3) promotes  
1196 ribosome biogenesis (1). ATP hydrolysis for the release of energy recycles Pi  
1197 and Mg<sup>2+</sup>, whereas the biosynthetic transfer of Pi typically recycles cytoplasmic  
1198 Mg<sup>2+</sup>. (B) After consuming the Mg<sup>2+</sup> present in the environment, cells  
1199 eventually experience a shortage in cytoplasmic Mg<sup>2+</sup> levels (20, 21, 56).  
1200 Insufficient cytoplasmic Mg<sup>2+</sup> impairs ribosomal subunit assembly, lowering  
1201 translation efficiency (26). This reduces the consumption of ATP by translation  
1202 reactions and, consequently, decreases the recycling of Mg<sup>2+</sup> and Pi from  
1203 ATP:Mg<sup>2+</sup> (15). (C) *Salmonella enterica* expresses the MgtC membrane protein as  
1204 a homeostatic response to cytoplasmic Mg<sup>2+</sup> starvation. MgtC inhibits Pi uptake  
1205 through an unknown transporter (X), thereby preventing assimilation Pi into  
1206 ATP. As the levels of ATP and ribosomes decrease, free Mg<sup>2+</sup> ions necessary for  
1207 core processes such as translation are recovered, increasing the efficiency of  
1208 protein synthesis, and the recycling of Mg<sup>2+</sup> and Pi from ATP:Mg<sup>2+</sup>. The density  
1209 and size of cartoons represent the concentrations of Mg<sup>2+</sup>, Pi, and ribosomes.



1210 **Table S1. Bacterial strains and plasmids used in this study**

| Strain                                                | Relevant characteristics                                                                             | Source     |
|-------------------------------------------------------|------------------------------------------------------------------------------------------------------|------------|
| <b><i>Escherichia coli</i></b>                        |                                                                                                      |            |
| EC100D                                                | <i>pir</i> <sup>+</sup> (DHFR) host strain used for generation and propagation of plasmid constructs | Epicentre  |
| MG1655                                                | F <sup>-</sup> no $\gamma\delta$ $\lambda$ S (K12)                                                   | (92)       |
| <b><i>Salmonella enterica</i> serovar Typhimurium</b> |                                                                                                      |            |
| 14028s                                                | wild-type                                                                                            | (93)       |
| EL4                                                   | $\Delta$ <i>mgtC</i>                                                                                 | (30)       |
| MP24                                                  | $\Delta$ <i>atpB</i> ::Km <sup>R</sup>                                                               | (93)       |
| MP25                                                  | $\Delta$ <i>mgtC</i> $\Delta$ <i>atpB</i> ::Km <sup>R</sup>                                          | This study |
| MP1251                                                | $\Delta$ <i>pitA</i> ::Ap <sup>R</sup>                                                               | This study |
| MP1252                                                | $\Delta$ <i>yjbB</i> ::Km <sup>R</sup>                                                               | This study |
| MP1479p                                               | $\Delta$ <i>pitA</i> ::Ap <sup>R</sup> $\Delta$ <i>yjbB</i> ::Km <sup>R</sup>                        | This study |
| MP1254                                                | $\Delta$ <i>mgtC</i> $\Delta$ <i>pitA</i> ::Ap <sup>R</sup>                                          | This study |
| MP1255                                                | $\Delta$ <i>mgtC</i> $\Delta$ <i>yjbB</i> ::Km <sup>R</sup>                                          | This study |
| MP1720                                                | $\Delta$ <i>mgtC</i> $\Delta$ <i>pstSCAB</i> ::Km <sup>R</sup>                                       | This study |
| RB39                                                  | $\Delta$ <i>pitA</i> $\Delta$ <i>pstSCAB</i> ::Km <sup>R</sup> $\Delta$ <i>yjbB</i> (3 $\Delta$ Pi)  | This study |
| MP1665                                                | <i>phoR</i> <sup>L421A</sup>                                                                         | This study |
| <b>Plasmids</b>                                       |                                                                                                      |            |
| pSIM6                                                 | rep <sub>pSC101</sub> <sup>ts</sup> Amp <sup>R</sup> P <sub>CI857</sub> - $\gamma$ $\beta$ exo       | (81)       |
| pCP20                                                 | rep <sub>pSC101</sub> <sup>ts</sup> $\lambda$ cI857 FLP Amp <sup>R</sup> Cm <sup>R</sup>             | (94)       |
| pKD4                                                  | rep <sub>R6K<math>\gamma</math></sub> Amp <sup>R</sup> FRT Km <sup>R</sup> FRT                       | (95)       |
| pKD4-Ap <sup>r</sup>                                  | rep <sub>R6K<math>\gamma</math></sub> Amp <sup>R</sup> FRT Apr <sup>R</sup> FRT                      | (96)       |
| pSLC-242                                              | rep <sub>R6K<math>\gamma</math></sub> Amp <sup>R</sup> FRT Cm <sup>R</sup> <i>PrhaB-relE</i> FRT     | (89)       |
| pUHE-21-2- <i>lacI</i> <sup>q</sup>                   | rep <sub>pMB1</sub> <i>lacI</i> <sup>q</sup> Amp <sup>R</sup> vector control                         | (86)       |
| pUHE-MgtC                                             | rep <sub>pMB1</sub> <i>lacI</i> <sup>q</sup> Amp <sup>R</sup> <i>Plac-mgtC</i>                       | (97)       |
| pUHE-PstSCAB                                          | rep <sub>pMB1</sub> <i>lacI</i> <sup>q</sup> Amp <sup>R</sup> <i>Plac-pstSCAB</i>                    | This study |
| pUHE-PmrB                                             | rep <sub>pMB1</sub> <i>lacI</i> <sup>q</sup> Amp <sup>R</sup> <i>Plac-pmrB</i>                       | (98)       |
| pGFPc                                                 | rep <sub>p15A</sub> Cm <sup>R</sup> promoterless <i>gfp</i> vector control                           | (15)       |
| pPpstS-GFPc                                           | rep <sub>p15A</sub> Cm <sup>R</sup> <i>PpstS-gfp</i>                                                 | (15)       |
| pPmgtCB-GFPc                                          | rep <sub>p15A</sub> Cm <sup>R</sup> <i>PmgtCB-gfp</i>                                                | This study |
| pPphoB-GFPc                                           | rep <sub>p15A</sub> Cm <sup>R</sup> <i>PphoB-gfp</i>                                                 | (15)       |
| pGFP <sub>AAV</sub>                                   | rep <sub>pMB1</sub> Amp <sup>R</sup> promoterless <i>gfp</i> <sub>AAV</sub> vector control           | (15)       |
| pPpstS-GFP <sub>AAV</sub>                             | rep <sub>pMB1</sub> Amp <sup>R</sup> <i>PpstS-gfp</i> <sub>AAV</sub>                                 | (15)       |
| pBbB2k-GFP                                            | rep <sub>BBR1</sub> Km <sup>R</sup> <i>tetR Ptet-gfp</i>                                             | (87)       |
| pBbB2K-AtpAGD                                         | rep <sub>BBR1</sub> Km <sup>R</sup> <i>tetR Ptet-atpAGD</i>                                          | This study |

1211

1212

1213

1214 **Table S2. Oligonucleotides sequences used in this study**

| Name  | Sequence (5' → 3')                                                           | Purpose                                                           |
|-------|------------------------------------------------------------------------------|-------------------------------------------------------------------|
| W3324 | AGCGCCTGAAAATGGTATTATCTGAAATATATAAGAT<br>AAGTGTAGGCTGGAGCTGCTTC              | <i>pitA</i> inactivation                                          |
| W3325 | TATCCGGCCCATTTGGCTTAAATAATCTTCAGGGAAAGC<br>CATATGAATATCCTCCTTA               | <i>pitA</i> inactivation                                          |
| W3326 | TCCTCAGTGGTCGACCAGC                                                          | <i>pitA::Apr<sup>R</sup></i> verification                         |
| W3319 | GCTTCAGGAAAACGTATAACGATAAAGGAGAACCTGAC<br>GCCGTGTAGGCTGGAGCTGCTTC            | <i>yjbB</i> inactivation                                          |
| W3320 | GCGCATGTTCTCCGTAGGCCCGCCATCCGGCATTTCAC<br>CATATGAATATCCTCCTTA                | <i>yjbB</i> inactivation                                          |
| W3318 | ACGCCAGCAGGCCTTAACGC                                                         | <i>yjbB::Km<sup>R</sup></i> verification                          |
| 342   | TTTGCTCATCGTAGCAACTCAAACAACGATTACCGAA<br>ACGTGTAGGCTGGAGCTGCTTC              | <i>pstSCAB</i> inactivation                                       |
| 343   | GGAAATATGTTTATTAAGGTTCCAGACTGTCCATTACGCA<br>CTCATATGAATATCCTCCTTA            | <i>pstSCAB</i> inactivation                                       |
| 340   | TGCGCAAACAGTCTAATTC                                                          | <i>pstSCAB::Km<sup>R</sup></i><br>verification                    |
| 143   | TGTCCAGATAGCCAGTAGC                                                          | pKD4 inserts<br>verification                                      |
| 446   | GAGAAATTA ACTATGAGAGGAATGAAAGTTATGCGTAC<br>CA                                | <i>pstSCAB</i> cloning into<br>pUHE-21-2- <i>lacI<sup>q</sup></i> |
| 447   | GTCCAAGCTCAGCTAATTAAGCACGCACTCCTGAATTA<br>ACCG                               | <i>pstSCAB</i> cloning into<br>pUHE-21-2- <i>lacI<sup>q</sup></i> |
| 448   | ATACAGCGCCTTACCGTT                                                           | pPstSCAB verification                                             |
| 449   | AGGTGACGATGTGTGGCCA                                                          | pPstSCAB verification                                             |
| 450   | CGTCGATACCACGCGTGAT                                                          | pPstSCAB verification                                             |
| 451   | TTATCGTCTGGCGGCGTC                                                           | pPstSCAB verification                                             |
| 452   | TCGTTCCATAATGCGGCT                                                           | pPstSCAB verification                                             |
| 799   | CTATCAGTGATAGAGAAAAGAAAATTA ACTATGAGAGG<br>AT                                | <i>atpAGD</i> cloning into<br>pBbB2k                              |
| 800   | GAGATCCTTACTCGAGTTTGGATCAGCTAGCTTGGATT<br>TCAC                               | <i>atpAGD</i> cloning into<br>pBbB2k                              |
| W3443 | GACAGCTTATCATCGATAAGCTTCTGAATGATCGACCG<br>AGACAG                             | <i>PmgtCB-gfp</i> cloning into<br>pACYC184                        |
| W3444 | GGCTCTCAAGGCATCGGTCGACGTTGAGATCCAGTTC<br>GATGTAA                             | <i>PmgtCB-gfp</i> cloning into<br>pACYC184                        |
| 477   | AGTTCGCCTGGCAAAGGAACGCGATTTAGCTTTGTGCAT<br>ATGAATATCCTCCTTA                  | <i>phoR<sup>L421A</sup></i> mutation                              |
| 478   | GGCAATTAATCGCTATTTTGGCAATTAACGTTCCGGG<br>TGTAGGCTGGAGCTGCTTC                 | <i>phoR<sup>L421A</sup></i> mutation                              |
| 480   | AATTAATCGCTATTTTGGCAATTAACGTTCCGGCGCC<br>ACAAAGCTAAATCGCGTTCCTTTGCCAGGCGAACT | <i>phoR<sup>L421A</sup></i> mutation                              |
| 481   | AGTCTTACTGCCTGTGGATG                                                         | <i>phoR<sup>L421A</sup></i> verification                          |
| 482   | ACGCATATTACGGTGAGCT                                                          | <i>phoR<sup>L421A</sup></i> verification                          |

1215

1216

1217

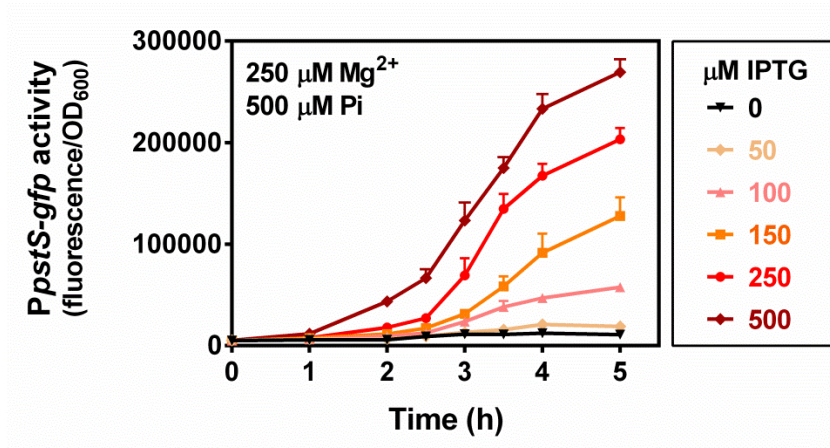

1218

1219 **Figure S1. MgtC elicits a dose-dependent activation of the PhoB-activated**  
1220 **PpstSCAB transporter.** Fluorescence from wild-type (14028s) *Salmonella*  
1221 carrying pPpstS-GFPc during growth in MOPS medium containing 250  $\mu\text{M}$   
1222  $\text{MgCl}_2$ , 500  $\mu\text{M}$   $\text{K}_2\text{HPO}_4$ , and the indicated IPTG concentrations. Means  $\pm$  SDs of  
1223 three independent experiments are shown.

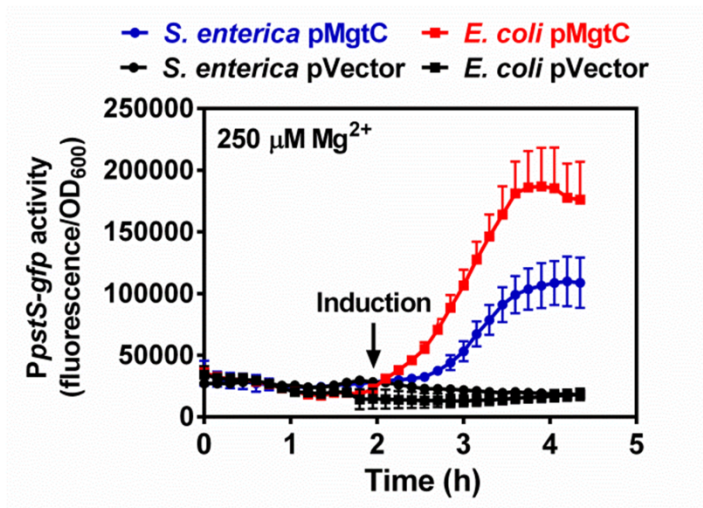

1224

1225 **Figure S2. Heterologous expression of *Salmonella* MgtC in *E. coli* activates**  
1226 **the PhoB/PhoR two-component system.** Fluorescence from wild-type (14028s)  
1227 *Salmonella enterica*, and wild-type *Escherichia coli* (MG1655) carrying pPpstS-  
1228 GFPc and either pMgtC (pUHE-MgtC) or pVector (pUHE-21). Cells were  
1229 grown in MOPS medium containing 250 μM MgCl<sub>2</sub> and 500 μM K<sub>2</sub>HPO<sub>4</sub>. 250  
1230 μM IPTG was added to the cultures following 2 h of growth. Means ± SDs of  
1231 three independent experiments are shown.

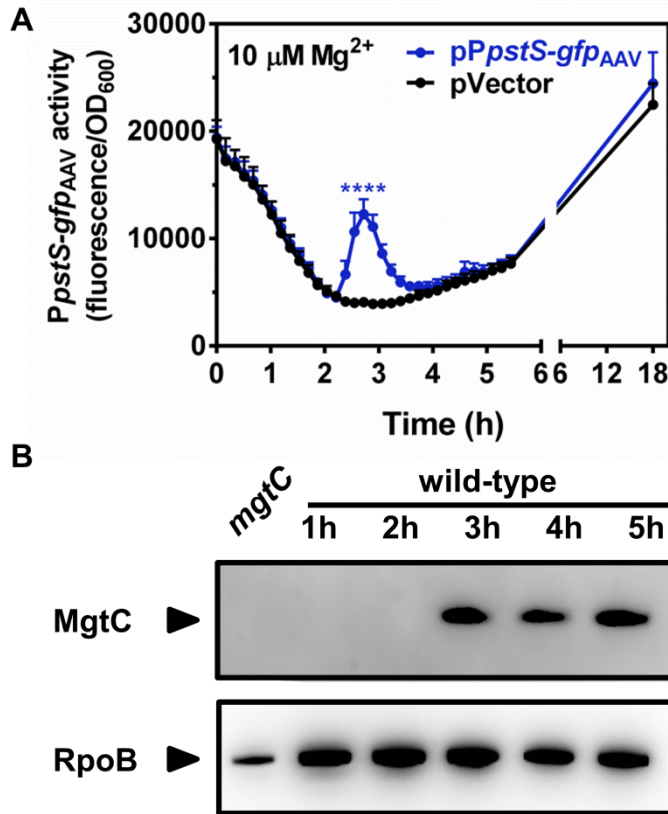

1232

1233 **Figure S3. Expression timing of *pstSCAB* and *MgtC* during cytoplasmic  $\text{Mg}^{2+}$**   
1234 **starvation.** (A) Fluorescence from wild-type (14028s) *Salmonella* carrying  
1235 *pPpstS-GFP<sub>AAV</sub>* or *pVector* (the promoterless *GFP<sub>AAV</sub>* vector *pGFP<sub>AAV</sub>*) plasmid.  
1236 Note that unstable GFP variants such as *GFP<sub>AAV</sub>* enable monitoring of activation  
1237 and silencing of gene expression (99). Cells were grown in MOPS medium  
1238 containing 10  $\mu\text{M MgCl}_2$  and 500  $\mu\text{M K}_2\text{HPO}_4$ . Means  $\pm$  SDs are shown. (B)  
1239 Immunoblot analysis using anti-MgtC (upper panel) or anti-RpoB (lower panel,  
1240 loading control) antibodies of crude extracts prepared from wild-type (14028s)  
1241 or *mgcC* (EL4) *Salmonella* at the indicated timepoints. Similar expression timings  
1242 are obtained when transcriptional fusions of *phoB-gfp* and *mgcC-gfp* are used  
1243 instead (15). For A and B, cells were grown in MOPS medium containing 10  
1244  $\mu\text{M MgCl}_2$  and 500  $\mu\text{M K}_2\text{HPO}_4$ . Graphs and images are representative of three  
1245 independent experiments.

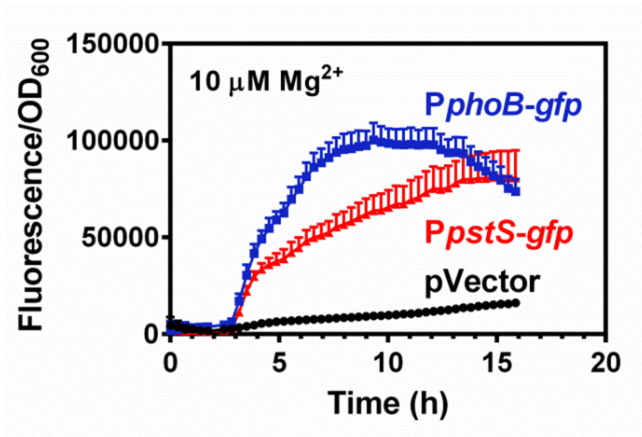

1246

1247 **Figure S4. Effect of Mg<sup>2+</sup> starvation on transcription of *phoB* and *pstSCAB* in**  
1248 *E. coli*. Fluorescence from wild-type (MG1655) *E. coli* carrying p*PphoB*-GFPc,  
1249 p*PpstS*-GFPc, or pVector (the promoterless GFP plasmid pGFPc). Cells were  
1250 grown in MOPS medium containing 10 μM MgCl<sub>2</sub> and 500 μM K<sub>2</sub>HPO<sub>4</sub>. Means  
1251 ± SDs of three independent experiments are shown.



1252

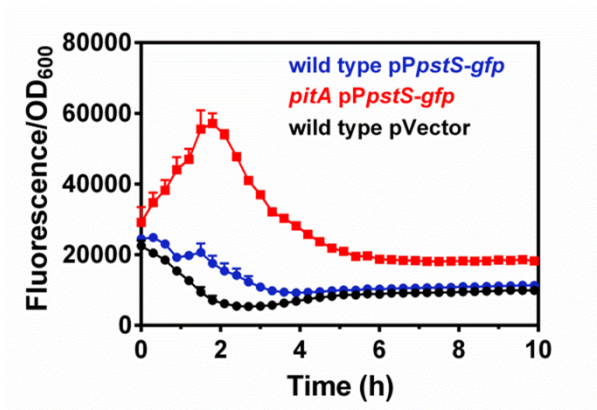

1253

1254 **Figure S5. Effect of deleting *pitA* Pi transporter on *pstS* transcription.**

1255 Fluorescence from wild-type (14028s) or *pitA* (MP1251) *Salmonella* carrying  
1256 pPpstS-GFPc or pVector (the promoterless GFP plasmid pGFPc). Cells were  
1257 grown in MOPS medium containing 250  $\mu$ M MgCl<sub>2</sub> and 1000  $\mu$ M K<sub>2</sub>HPO<sub>4</sub>.

1258 Means  $\pm$  SDs of three independent experiments are shown.



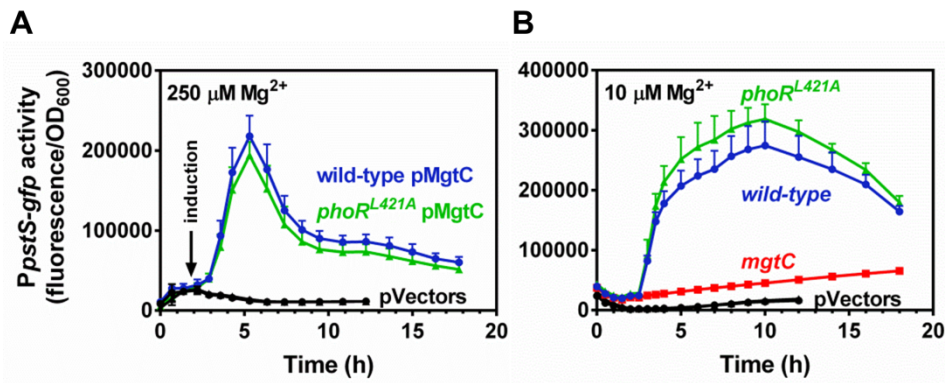

1259

1260 **Fig. S6. Effect of *phoR*<sup>L421A</sup> substitution on the activation of the PhoB/PhoR**  
1261 **two-component system.** (A) Fluorescence from wild-type (14028s) and  
1262 *phoR*<sup>L421A</sup> (MP1665) *Salmonella* carrying pP<sub>pstS</sub>-GFPc and either pMgtC (pUHE-  
1263 MgtC) or pVector (pUHE-21). Cells were grown in MOPS containing 250 μM  
1264 MgCl<sub>2</sub> and 500 μM K<sub>2</sub>HPO<sub>4</sub>. Following 2 h of growth, 250 μM IPTG was added  
1265 to the cultures. (B) Fluorescence from wild-type (14028s) and *phoR*<sup>L421A</sup>  
1266 (MP1665) *Salmonella* carrying pP<sub>pstS</sub>-GFPc or pVector (the promoterless GFP  
1267 plasmid pGFPc). Cells were grown in MOPS containing 10 μM MgCl<sub>2</sub> and 500  
1268 μM K<sub>2</sub>HPO<sub>4</sub>. Means ± SDs of at least three independent experiments are  
1269 shown.
